# Supplementary material for: Comparative analysis of two Caenorhabditis elegans kinesins KLP-6 and UNC-104 reveals a common and distinct activation mechanism in kinesin-3
Source: eLife. 2024 Jan 11;12:RP89040. doi: 10.7554/eLife.89040 (PMC10945585; doi:10.7554/eLife.89040)
Supplement: Figure 1—figure supplement 1—source data 1. — The velocity of microtubule gliding assays are shown. Dot plots are shown in Figure 1—figure supplement 1B, D, respectively. [file elife-89040-fig1-figsupp1-data1.xlsx]

## Sheet: Fig.1 Supplement 1
	Velocity (μm/sec)
	KLP-6FL (Anti-GFP antibody +)	KLP-6FL (Anti-GFP antibody -)	KLP-6(1-390)	KLP-6(1-587)	KLP-6(1-587)(D458A)
n	115	127	180	107	103
Average	0.0523841	0.154866	0.120331	0.116733	0.114367
SD	0.033865	0.0203402	0.0152947	0.0179486	0.0188791
Data	0.000403531	0.0538053	0.0470588	0.0414986	0.048
	0.00121673	0.0699754	0.0588072	0.0593906	0.0745567
	0.00360451	0.115274	0.0823219	0.0761905	0.0763871
	0.00364096	0.116136	0.0844733	0.086238	0.0779695
	0.00567089	0.128577	0.0888213	0.087082	0.0804469
	0.00691233	0.129379	0.0888889	0.089761	0.0827376
	0.00694764	0.131079	0.0954907	0.089985	0.0828426
	0.00776501	0.131329	0.0972233	0.0908908	0.0852812
	0.00847415	0.131338	0.0975357	0.0922644	0.0872727
	0.00930468	0.131652	0.0983362	0.0926434	0.0916583
	0.0104993	0.133921	0.0988173	0.0926641	0.0930049
	0.0108407	0.134645	0.100688	0.0950882	0.0932735
	0.0108679	0.136691	0.101183	0.098058	0.0935849
	0.0108953	0.136909	0.101255	0.098493	0.0943953
	0.0108978	0.137027	0.101557	0.0986744	0.0956131
	0.0116437	0.137477	0.101598	0.0989415	0.0956522
	0.0117024	0.13749	0.102611	0.0991017	0.0961317
	0.0125411	0.137667	0.103704	0.101146	0.0975448
	0.0133502	0.138182	0.10397	0.101381	0.0978113
	0.0140527	0.139113	0.104447	0.102128	0.0990173
	0.0141236	0.139397	0.104501	0.102692	0.0994462
	0.0149684	0.14008	0.105162	0.102706	0.099695
	0.0206844	0.140113	0.105366	0.103081	0.0998985
	0.0207898	0.140143	0.105538	0.10499	0.101255
	0.0213333	0.140336	0.105856	0.105118	0.101266
	0.0232177	0.14084	0.106129	0.106667	0.101412
	0.0241741	0.141669	0.106266	0.108036	0.101722
	0.024803	0.142049	0.106935	0.108072	0.101961
	0.0250435	0.142174	0.106938	0.108534	0.102109
	0.0256	0.142222	0.10725	0.108912	0.103207
	0.0263625	0.142268	0.107359	0.109492	0.1034
	0.0268323	0.142574	0.107982	0.111037	0.104357
	0.0280106	0.142631	0.108091	0.111287	0.104385
	0.0281274	0.143034	0.108242	0.112034	0.105372
	0.0290166	0.143089	0.108564	0.112229	0.106667
	0.029834	0.143238	0.109574	0.112251	0.106981
	0.0302648	0.143377	0.109643	0.112626	0.108032
	0.0313088	0.144111	0.109865	0.112762	0.108228
	0.0314687	0.144266	0.109983	0.112818	0.108367
	0.0318325	0.144346	0.110796	0.113633	0.1093
	0.0320406	0.144862	0.11102	0.113672	0.110026
	0.0328517	0.144938	0.111211	0.113706	0.110143
	0.0328517	0.145093	0.111628	0.114199	0.110289
	0.0339394	0.145364	0.111972	0.114381	0.11102
	0.034931	0.145455	0.112	0.114495	0.111252
	0.0371903	0.146117	0.112302	0.114568	0.111706
	0.0377186	0.146173	0.11263	0.114717	0.112224
	0.0378841	0.14653	0.112917	0.1152	0.112762
	0.0379108	0.147323	0.113181	0.115485	0.114434
	0.0382697	0.147537	0.113826	0.115786	0.115649
	0.0384324	0.147725	0.113955	0.116696	0.115862
	0.0392415	0.147995	0.114557	0.116844	0.117333
	0.0398982	0.14806	0.114595	0.116915	0.11756
	0.0420202	0.150033	0.1147	0.117213	0.11816
	0.0428571	0.150775	0.11513	0.117895	0.118209
	0.0447919	0.151705	0.1152	0.118624	0.11834
	0.0461218	0.152732	0.115489	0.118672	0.1184
	0.0464061	0.152828	0.116054	0.118891	0.118579
	0.0469987	0.153666	0.116142	0.119083	0.119056
	0.0480407	0.153897	0.116546	0.119124	0.119216
	0.0490511	0.153932	0.116583	0.119755	0.119485
	0.0494309	0.154189	0.116616	0.119887	0.119803
	0.0494508	0.154883	0.116886	0.120055	0.120532
	0.0514603	0.154975	0.116979	0.120195	0.122213
	0.0535409	0.155429	0.117073	0.120713	0.123015
	0.0538318	0.156305	0.117452	0.121379	0.123564
	0.055369	0.157096	0.11751	0.121502	0.12436
	0.0566154	0.157867	0.11759	0.121925	0.124896
	0.0588932	0.158699	0.117937	0.122253	0.124952
	0.059751	0.158766	0.11811	0.123202	0.125146
	0.059798	0.159286	0.118136	0.123352	0.126032
	0.0612766	0.161486	0.118235	0.126171	0.126162
	0.0617363	0.161584	0.118323	0.126439	0.126625
	0.0625381	0.162037	0.118386	0.126512	0.126682
	0.0665826	0.162093	0.118412	0.126718	0.12769
	0.0666212	0.162145	0.118429	0.126966	0.127837
	0.0667961	0.162168	0.118796	0.127239	0.128395
	0.0676846	0.162353	0.119008	0.127247	0.128568
	0.0722202	0.162718	0.119034	0.127354	0.129218
	0.0756511	0.162874	0.119042	0.127576	0.12973
	0.0759184	0.163129	0.119216	0.128726	0.130225
	0.0763349	0.163357	0.119335	0.129343	0.13037
	0.0768389	0.16402	0.119382	0.129379	0.130727
	0.0798351	0.16407	0.119494	0.132308	0.131101
	0.08	0.164159	0.119547	0.132525	0.131315
	0.0836425	0.164634	0.119728	0.133189	0.131368
	0.0844444	0.164848	0.119949	0.133536	0.131765
	0.084898	0.165361	0.12	0.133843	0.132126
	0.0860624	0.165468	0.120207	0.134194	0.133374
	0.0865336	0.166736	0.120231	0.134785	0.133543
	0.0867519	0.166761	0.120255	0.135593	0.1344
	0.0870588	0.166957	0.120301	0.135657	0.134438
	0.0880313	0.167218	0.120304	0.136614	0.134493
	0.0902857	0.168177	0.12032	0.137143	0.134517
	0.0910167	0.168454	0.120412	0.137461	0.136158
	0.0925786	0.16853	0.12069	0.138603	0.136453
	0.0945455	0.168918	0.120919	0.138927	0.136579
	0.0968421	0.169412	0.120976	0.139081	0.138402
	0.0978113	0.169823	0.121008	0.139316	0.138722
	0.0985551	0.170319	0.121418	0.140165	0.140637
	0.0988651	0.170417	0.121469	0.141027	0.146087
	0.0996188	0.1708	0.121905	0.141824	0.154569
	0.100052	0.171043	0.122544	0.143738	0.173014
	0.100756	0.171133	0.122759	0.145455
	0.100773	0.172134	0.123338	0.145955
	0.102907	0.172568	0.123478	0.148988
	0.10302	0.173675	0.123711	0.149873
	0.105495	0.175219	0.124045
	0.107935	0.175568	0.124647
	0.109969	0.175975	0.12517
	0.110786	0.176211	0.125557
	0.112593	0.176535	0.125591
	0.116881	0.177047	0.125642
	0.118938	0.177282	0.126081
	0.129874	0.177282	0.126171
		0.178577	0.126316
		0.179408	0.126359
		0.179596	0.126512
		0.179651	0.126667
		0.180958	0.126897
		0.181417	0.126897
		0.182278	0.126951
		0.185263	0.126966
		0.185875	0.12737
		0.193352	0.1275
		0.197968	0.127597
		0.201026	0.127915
			0.128137
			0.128155
			0.128355
			0.128362
			0.128395
			0.128715
			0.12878
			0.128955
			0.129145
			0.129362
			0.12943
			0.12969
			0.129843
			0.13
			0.130119
			0.130233
			0.13043
			0.130518
			0.130638
			0.131669
			0.131994
			0.13201
			0.132507
			0.132862
			0.133097
			0.133127
			0.133194
			0.133818
			0.133906
			0.13401
			0.134788
			0.135065
			0.135121
			0.135385
			0.136063
			0.136911
			0.137143
			0.137748
			0.139065
			0.1408
			0.141176
			0.141561
			0.142102
			0.143806
			0.144593
			0.146953
			0.148358
			0.148892
			0.152727
			0.153535
			0.154074
			0.157009
			0.165
