# Supplementary material for: Comparative analysis of two Caenorhabditis elegans kinesins KLP-6 and UNC-104 reveals a common and distinct activation mechanism in kinesin-3
Source: eLife. 2024 Jan 11;12:RP89040. doi: 10.7554/eLife.89040 (PMC10945585; doi:10.7554/eLife.89040)
Supplement: Figure 2—figure supplement 1—source data 1. — The result of single molecule assays using KLP-6 mutant proteins. Landing rate and dwell time are shown. Dot plots are shown in Figure 2—figure supplement 1B, C, respectively. [file elife-89040-fig2-figsupp1-data1.xlsx]

## Sheet: Fig.2 Supplement 1
	Landing rate (/μm/sec)							Dwell time (sec)
	KLP-6FL	KLP-6(1-587)	KLP-6(1-390)	KLP-6(580-928)	KLP-6(350-928)			KLP-6FL	KLP-6(1-587)	KLP-6(1-390)	KLP-6(580-928)	KLP-6(350-928)
n	31	33	27	42	39		n	348	338	326	412	403
Median	0.0091109	0.00347491	0.0201958	0.00542146	0.0105213		Median	3.66192	0.61032	1.42408	1.83096	0.949353
Data	0.0243559	0.00264841	0.0195141	0.00221417	0.00752365		Data	0.30516	0.15258	0.339033	0.10172	0.15258
	0.0131852	0.00375226	0.0209465	0.00564995	0.0087776			0.61032	0.20344	0.339033	0.30516	0.169567
	0.0179497	0.0021944	0.0213633	0.00365009	0.0114758			0.61032	0.20344	0.339033	0.30516	0.20344
	0.0136108	0.00288918	0.0281306	0.00430102	0.00999671			0.61032	0.20344	0.339033	0.35602	0.20344
	0.0128389	0.00163413	0.0222998	0.00227567	0.00855035			0.678167	0.2543	0.339134	0.40688	0.20344
	0.0182949	0.00345872	0.0175552	0.00330549	0.0125939			0.71204	0.271287	0.40688	0.40688	0.237414
	0.0173079	0.00264588	0.0272343	0.00253664	0.0138548			0.71204	0.271287	0.40688	0.40688	0.271186
	0.0110236	0.00532926	0.0173949	0.00583849	0.0129854			0.71204	0.30516	0.40688	0.40688	0.271287
	0.0180172	0.00422625	0.0178013	0.00561003	0.011046			0.71204	0.30516	0.40688	0.40688	0.271287
	0.0123851	0.00648779	0.0208011	0.00482959	0.0111715			0.71204	0.30516	0.40688	0.40688	0.271287
	0.00637863	0.00286894	0.016703	0.00788798	0.00706868			0.81376	0.30516	0.40688	0.40688	0.271287
	0.0082712	0.00372383	0.0121727	0.00580408	0.00691236			0.81376	0.30516	0.40688	0.45774	0.30516
	0.00710567	0.00388881	0.023632	0.00463722	0.00562508			0.81376	0.339033	0.40688	0.5086	0.30516
	0.00573788	0.000835962	0.0195906	0.00560461	0.0131959			0.81376	0.339033	0.40688	0.5086	0.30516
	0.00536409	0.00107795	0.0221348	0.00392682	0.00654424			0.81376	0.339033	0.474727	0.5086	0.30516
	0.00633938	0.00197048	0.0250432	0.00469629	0.00444168			0.81376	0.339033	0.474727	0.5086	0.30516
	0.00736186	0.00294591	0.0220445	0.002657	0.0118259			0.81376	0.339033	0.474727	0.5086	0.30516
	0.00930957	0.00554695	0.0182731	0.00450959	0.00869744			0.81376	0.339033	0.474727	0.5086	0.30516
	0.00662872	0.00330142	0.0115889	0.00443756	0.00644348			0.81376	0.339134	0.542473	0.5086	0.339033
	0.00450369	0.0039927	0.017472	0.0051533	0.00594611			0.81376	0.339134	0.542473	0.5086	0.339134
	0.0088459	0.00332817	0.0179799	0.00154574	0.0138609			0.81376	0.35602	0.542473	0.55946	0.339134
	0.00828075	0.00521336	0.0346316	0.00542146	0.0171679			0.81376	0.35602	0.542473	0.55946	0.35602
	0.0112201	0.00349109	0.0115658	0.00271572	0.0240281			0.81376	0.35602	0.542574	0.55946	0.373007
	0.00928792	0.00211873	0.0160287	0.0043888	0.0163848			0.81376	0.35602	0.61032	0.55946	0.373007
	0.011046	0.00325187	0.0250863	0.00676687	0.0126555			0.81376	0.35602	0.61032	0.55946	0.40688
	0.00616634	0.00205955	0.0216741	0.00923958	0.016059			0.881506	0.372906	0.61032	0.55946	0.40688
	0.00860204	0.00842366	0.0193282	0.0103225	0.0122886			0.91548	0.372906	0.61032	0.55946	0.40688
	0.0128229	0.0049286		0.00930957	0.0279786			0.91548	0.372906	0.61032	0.55946	0.40688
	0.0124625	0.00415157		0.00648034	0.0130976			0.91548	0.373007	0.61032	0.55946	0.40688
	0.00893387	0.00271572		0.00660679	0.0128331			0.91548	0.373007	0.61032	0.55946	0.440753
	0.00622209	0.0075941		0.00819242	0.0175283			0.91548	0.373007	0.61032	0.55946	0.440753
		0.00515207		0.011134	0.00535397			0.949353	0.40688	0.61032	0.61032	0.440854
		0.00415157		0.0111084	0.0043888			1.0172	0.40688	0.61032	0.61032	0.440854
				0.00464975	0.00130268			1.0172	0.40688	0.61032	0.61032	0.440854
				0.00281615	0.00485991			1.0172	0.40688	0.678066	0.61032	0.440854
				0.00952607	0.00637618			1.0172	0.40688	0.678066	0.61032	0.45774
				0.00320017	0.00844			1.11892	0.40688	0.678066	0.61032	0.45774
				0.00632503	0.00675875			1.11892	0.40688	0.678167	0.61032	0.45774
				0.00483261	0.00593779			1.11892	0.40688	0.678167	0.61032	0.45774
				0.008862				1.11892	0.40688	0.678167	0.61032	0.45774
				0.00596877				1.11892	0.40688	0.678167	0.61032	0.474626
				0.00796486				1.11892	0.40688	0.678167	0.61032	0.474626
								1.11892	0.40688	0.678167	0.61032	0.474626
								1.15279	0.40688	0.71204	0.61032	0.474626
								1.15289	0.40688	0.71204	0.66118	0.474626
								1.15289	0.40688	0.745913	0.66118	0.474727
								1.22064	0.40688	0.745913	0.66118	0.474727
								1.22064	0.40688	0.745913	0.66118	0.474727
								1.22064	0.40688	0.745913	0.66118	0.474727
								1.22064	0.40688	0.745913	0.66118	0.474727
								1.22064	0.40688	0.745913	0.66118	0.5086
								1.22064	0.40688	0.745913	0.66118	0.5086
								1.22064	0.440753	0.745913	0.66118	0.5086
								1.32236	0.440753	0.745913	0.71204	0.5086
								1.32236	0.440753	0.745913	0.71204	0.5086
								1.32236	0.440753	0.745913	0.71204	0.5086
								1.32236	0.440753	0.746014	0.71204	0.5086
								1.42408	0.440854	0.746014	0.71204	0.5086
								1.42408	0.440854	0.746014	0.71204	0.525587
								1.42408	0.45774	0.746014	0.745913	0.542473
								1.42408	0.45774	0.746014	0.745913	0.542473
								1.42408	0.45774	0.746014	0.7629	0.542473
								1.42408	0.45774	0.746014	0.7629	0.542473
								1.42408	0.45774	0.746014	0.7629	0.542473
								1.5258	0.45774	0.746014	0.7629	0.542574
								1.5258	0.45774	0.81376	0.81376	0.542574
								1.5258	0.45774	0.81376	0.81376	0.576447
								1.5258	0.45774	0.81376	0.81376	0.576447
								1.5258	0.45774	0.81376	0.81376	0.61032
								1.5258	0.45774	0.81376	0.81376	0.61032
								1.5258	0.45774	0.81376	0.81376	0.61032
								1.55967	0.45774	0.81376	0.81376	0.61032
								1.62752	0.45774	0.81376	0.86462	0.61032
								1.62752	0.45774	0.81376	0.86462	0.61032
								1.62752	0.474626	0.81376	0.86462	0.61032
								1.62752	0.474626	0.881506	0.86462	0.61032
								1.62752	0.474626	0.881506	0.86462	0.61032
								1.62752	0.474626	0.881506	0.91548	0.61032
								1.62752	0.474626	0.881506	0.91548	0.61032
								1.62752	0.474626	0.881607	0.91548	0.61032
								1.62752	0.474626	0.881607	0.91548	0.61032
								1.69537	0.474626	0.881607	0.96634	0.61032
								1.72924	0.474727	0.881607	0.96634	0.644193
								1.72924	0.474727	0.881607	0.96634	0.644193
								1.72924	0.474727	0.881607	0.96634	0.66118
								1.72924	0.474727	0.881607	0.96634	0.66118
								1.72924	0.474727	0.881607	0.96634	0.66118
								1.7801	0.474727	0.91548	0.96634	0.66118
								1.83096	0.474727	0.91548	0.96634	0.678066
								1.83096	0.474727	0.949353	0.96634	0.678066
								1.83096	0.474727	0.949353	0.96634	0.678066
								1.89881	0.474727	0.949353	0.96634	0.678066
								1.93268	0.474727	0.949353	0.96634	0.678167
								1.93268	0.491613	0.949353	1.0172	0.678167
								1.93268	0.5086	0.949353	1.0172	0.678167
								1.93268	0.5086	0.949353	1.0172	0.678167
								1.93268	0.5086	0.949353	1.0172	0.678167
								2.0344	0.5086	0.949353	1.0172	0.678167
								2.0344	0.5086	0.949454	1.0172	0.71204
								2.0344	0.5086	0.949454	1.0172	0.71204
								2.0344	0.5086	1.0172	1.0172	0.71204
								2.0344	0.5086	1.0172	1.06806	0.71204
								2.13612	0.5086	1.0172	1.06806	0.71204
								2.13612	0.5086	1.0172	1.06806	0.71204
								2.13612	0.5086	1.0172	1.06806	0.71204
								2.13612	0.5086	1.0172	1.08495	0.71204
								2.16999	0.5086	1.0172	1.11892	0.71204
								2.17009	0.5086	1.0172	1.11892	0.71204
								2.23784	0.542473	1.08495	1.11892	0.71204
								2.23784	0.542473	1.08495	1.11892	0.71204
								2.23784	0.542473	1.08495	1.11892	0.71204
								2.23784	0.542473	1.08495	1.11892	0.71204
								2.30559	0.542473	1.08495	1.11892	0.71204
								2.30569	0.542473	1.08505	1.11892	0.71204
								2.30569	0.542473	1.08505	1.15279	0.71204
								2.33956	0.542473	1.08505	1.16978	0.71204
								2.33956	0.542473	1.08505	1.16978	0.71204
								2.44128	0.542473	1.08505	1.16978	0.71204
								2.44128	0.542473	1.11892	1.16978	0.71204
								2.44128	0.542574	1.15279	1.16978	0.71204
								2.44128	0.542574	1.15279	1.16978	0.745913
								2.543	0.542574	1.15279	1.16978	0.745913
								2.543	0.542574	1.15279	1.22064	0.745913
								2.543	0.542574	1.15279	1.22064	0.745913
								2.57687	0.542574	1.15279	1.22064	0.745913
								2.57687	0.55946	1.15279	1.22064	0.745913
								2.57687	0.55946	1.15279	1.22064	0.745913
								2.64472	0.55946	1.15279	1.22064	0.746014
								2.64472	0.55946	1.15289	1.22064	0.746014
								2.64472	0.55946	1.15289	1.22064	0.746014
								2.74644	0.55946	1.15289	1.22064	0.746014
								2.74644	0.55946	1.15289	1.22064	0.7629
								2.74644	0.55946	1.15289	1.22064	0.7629
								2.78031	0.55946	1.16978	1.22064	0.7629
								2.78041	0.55946	1.22064	1.2715	0.7629
								2.84816	0.55946	1.22064	1.2715	0.7629
								2.84816	0.55946	1.22064	1.2715	0.81376
								2.84816	0.55946	1.22064	1.2715	0.81376
								2.91591	0.55946	1.22064	1.2715	0.81376
								2.94988	0.55946	1.22064	1.2715	0.81376
								2.98375	0.55946	1.22064	1.2715	0.81376
								2.98385	0.55946	1.22064	1.2715	0.81376
								3.0516	0.55946	1.22064	1.28839	0.81376
								3.0516	0.576447	1.22064	1.28849	0.81376
								3.0516	0.576447	1.22064	1.32236	0.81376
								3.0516	0.576447	1.22064	1.32236	0.81376
								3.15332	0.576447	1.22064	1.32236	0.81376
								3.15332	0.593333	1.22064	1.32236	0.81376
								3.25504	0.61032	1.23763	1.32236	0.81376
								3.25504	0.61032	1.2715	1.32236	0.81376
								3.25504	0.61032	1.28839	1.32236	0.81376
								3.25504	0.61032	1.28849	1.32236	0.81376
								3.25504	0.61032	1.28849	1.37322	0.81376
								3.25504	0.61032	1.28849	1.37322	0.81376
								3.45848	0.61032	1.35623	1.37322	0.81376
								3.45848	0.61032	1.35623	1.37322	0.81376
								3.45848	0.61032	1.35623	1.42408	0.81376
								3.45848	0.61032	1.35623	1.42408	0.81376
								3.45848	0.61032	1.35623	1.42408	0.81376
								3.45848	0.61032	1.35623	1.42408	0.81376
								3.52633	0.61032	1.35623	1.42408	0.81376
								3.5602	0.61032	1.35633	1.42408	0.81376
								3.5602	0.61032	1.42408	1.42408	0.81376
								3.5602	0.61032	1.42408	1.42408	0.81376
								3.5602	0.61032	1.42408	1.47494	0.81376
								3.5602	0.61032	1.42408	1.47494	0.81376
								3.5602	0.61032	1.42408	1.47494	0.81376
								3.5602	0.61032	1.42408	1.47494	0.81376
								3.5602	0.61032	1.42408	1.47494	0.847734
								3.59417	0.61032	1.42408	1.47494	0.86462
								3.66192	0.61032	1.42408	1.47494	0.86462
								3.66192	0.61032	1.49183	1.47494	0.86462
								3.66192	0.61032	1.49183	1.49193	0.86462
								3.66192	0.61032	1.49183	1.5258	0.881506
								3.66192	0.644193	1.49183	1.5258	0.881506
								3.71278	0.644294	1.49193	1.5258	0.881506
								3.76364	0.644294	1.49193	1.55967	0.881506
								3.76364	0.66118	1.49193	1.55977	0.881607
								3.76364	0.66118	1.49193	1.57666	0.881607
								3.76364	0.66118	1.49193	1.57666	0.881607
								3.78063	0.66118	1.5258	1.57666	0.881607
								3.86536	0.66118	1.5258	1.57666	0.91548
								3.93311	0.66118	1.55967	1.57666	0.91548
								3.96708	0.66118	1.55967	1.62752	0.91548
								4.01794	0.66118	1.55967	1.62752	0.91548
								4.0688	0.66118	1.55967	1.62752	0.91548
								4.0688	0.66118	1.55977	1.62752	0.91548
								4.0688	0.678066	1.55977	1.62752	0.91548
								4.0688	0.678066	1.62752	1.67838	0.91548
								4.13655	0.678066	1.62752	1.67838	0.91548
								4.17052	0.678066	1.62752	1.67838	0.91548
								4.17052	0.678066	1.62752	1.67838	0.91548
								4.17052	0.678066	1.62752	1.71225	0.91548
								4.17052	0.678066	1.69527	1.72924	0.91548
								4.20439	0.678167	1.69527	1.72924	0.91548
								4.27224	0.678167	1.69537	1.72924	0.91548
								4.27224	0.678167	1.69537	1.72924	0.91548
								4.27224	0.678167	1.72924	1.72924	0.91548
								4.37396	0.678167	1.72924	1.72924	0.91548
								4.37396	0.678167	1.72924	1.72924	0.91548
								4.37396	0.71204	1.76311	1.72924	0.949353
								4.45869	0.71204	1.76311	1.76311	0.949353
								4.47568	0.71204	1.76321	1.7801	0.949353
								4.67912	0.71204	1.76321	1.7801	0.949353
								4.67912	0.71204	1.76321	1.83096	0.949353
								4.74697	0.71204	1.83096	1.83096	0.949454
								4.78084	0.71204	1.83096	1.83096	0.949454
								4.95041	0.71204	1.83096	1.88182	0.949454
								4.98428	0.71204	1.83096	1.88182	0.949454
								5.086	0.71204	1.83096	1.88182	0.949454
								5.086	0.745913	1.83096	1.88182	0.96634
								5.086	0.745913	1.83096	1.88182	0.96634
								5.18772	0.745913	1.83096	1.88182	0.96634
								5.18772	0.745913	1.89871	1.88182	0.983327
								5.28944	0.745913	1.89871	1.88182	0.983327
								5.28944	0.745913	1.89881	1.89881	1.0172
								5.35729	0.746014	1.89881	1.93268	1.0172
								5.35729	0.746014	1.93268	1.96655	1.0172
								5.39116	0.746014	1.96655	1.96655	1.0172
								5.39116	0.746014	1.96655	1.96655	1.0172
								5.49288	0.746014	1.96655	1.96655	1.0172
								5.5946	0.7629	2.0344	1.96665	1.0172
								5.69632	0.7629	2.0344	1.98354	1.0172
								5.69632	0.7629	2.0344	2.0344	1.0172
								5.83191	0.7629	2.0344	2.0344	1.0172
								5.89976	0.7629	2.0344	2.0344	1.06806
								5.89976	0.7629	2.0344	2.0344	1.06806
								5.89976	0.7629	2.10215	2.08526	1.06806
								5.89976	0.7629	2.10215	2.08526	1.08495
								6.00148	0.7629	2.10225	2.08526	1.08505
								6.00148	0.7629	2.10225	2.08526	1.08505
								6.00148	0.7629	2.16999	2.08526	1.08505
								6.03535	0.779887	2.16999	2.08526	1.08505
								6.03545	0.779887	2.17009	2.10215	1.11892
								6.1032	0.779887	2.17009	2.10215	1.11892
								6.1032	0.81376	2.17009	2.13612	1.11892
								6.20492	0.81376	2.18698	2.13612	1.11892
								6.23879	0.81376	2.23784	2.13612	1.11892
								6.30664	0.81376	2.23784	2.13612	1.11892
								6.30664	0.81376	2.25483	2.18698	1.11892
								6.30664	0.81376	2.30569	2.18698	1.11892
								6.40836	0.81376	2.30569	2.23784	1.11892
								6.40836	0.81376	2.30569	2.23784	1.11892
								6.42535	0.81376	2.37353	2.23784	1.11892
								6.44223	0.81376	2.44128	2.23784	1.15279
								6.6118	0.81376	2.44128	2.23784	1.15279
								6.71352	0.81376	2.44128	2.2887	1.15279
								6.71352	0.81376	2.44128	2.2887	1.15279
								6.81524	0.81376	2.44128	2.2887	1.15289
								6.91696	0.81376	2.44128	2.33956	1.15289
								6.91696	0.81376	2.44128	2.33956	1.16978
								7.05265	0.81376	2.44128	2.33956	1.16978
								7.1204	0.81376	2.50903	2.37343	1.16978
								7.1204	0.81376	2.50903	2.39042	1.16978
								7.18825	0.86462	2.50913	2.44128	1.16978
								7.42556	0.86462	2.543	2.44128	1.16978
								7.42556	0.86462	2.57687	2.44128	1.22064
								7.52728	0.86462	2.57697	2.49214	1.22064
								7.59503	0.86462	2.57697	2.49214	1.22064
								7.59513	0.881506	2.64472	2.50903	1.22064
								7.629	0.881607	2.64472	2.50913	1.22064
								7.79847	0.881607	2.71247	2.543	1.22064
								7.83244	0.881607	2.71257	2.543	1.22064
								7.83244	0.898493	2.71257	2.543	1.22064
								7.93416	0.898493	2.71257	2.543	1.22064
								8.20545	0.91548	2.78031	2.59386	1.22064
								8.23932	0.91548	2.84816	2.59386	1.22064
								8.44276	0.91548	2.84816	2.59386	1.2715
								8.61223	0.91548	2.84816	2.59386	1.28839
								8.74792	0.91548	2.84816	2.59386	1.28839
								8.84964	0.91548	2.84816	2.59386	1.28839
								8.84964	0.949353	2.91591	2.64472	1.28839
								9.05308	0.949353	2.91591	2.64472	1.28849
								9.05308	0.949353	2.91591	2.64472	1.28849
								9.05308	0.949353	2.91601	2.69558	1.32236
								9.1548	0.949353	3.00074	2.69558	1.32236
								9.25652	0.949353	3.0516	2.74644	1.32236
								9.25652	0.96634	3.06859	2.74644	1.32236
								9.35824	0.96634	3.11935	2.78031	1.32236
								9.35824	0.96634	3.11935	2.7973	1.35623
								9.49383	0.96634	3.11945	2.7973	1.35623
								9.6634	1.0172	3.11945	2.7973	1.35623
								9.76512	1.0172	3.18729	2.7973	1.35623
								9.83287	1.0172	3.25504	2.7973	1.37322
								9.83297	1.0172	3.25504	2.84816	1.37322
								9.86684	1.0172	3.39063	2.84816	1.39021
								9.96856	1.0172	3.39063	2.84816	1.42408
								10.3754	1.05107	3.39063	2.89902	1.42408
								10.3754	1.06806	3.45848	2.91601	1.42408
								10.5111	1.08505	3.45848	2.91601	1.42408
								10.7823	1.08505	3.59407	2.94988	1.42408
								10.8501	1.11892	3.66192	2.94988	1.42408
								10.884	1.11892	3.66192	2.98385	1.47494
								10.884	1.15279	3.86536	3.00074	1.47494
								10.884	1.15279	3.93311	3.00074	1.49193
								10.9858	1.16978	3.93311	3.00074	1.49193
								10.9858	1.22064	3.93321	3.0516	1.49193
								11.1892	1.2715	4.13665	3.0516	1.49193
								11.2909	1.28849	4.20449	3.0516	1.5258
								11.2909	1.28849	4.34009	3.0516	1.5258
								11.2909	1.28849	4.40783	3.0516	1.5258
								11.2909	1.32236	4.61137	3.10246	1.5258
								11.3926	1.35623	4.67912	3.10246	1.5258
								11.6978	1.35623	4.74687	3.10246	1.5258
								11.6978	1.35633	4.81471	3.15332	1.55967
								11.9012	1.39021	4.95031	3.15332	1.55967
								11.9012	1.42408	4.95041	3.15332	1.57666
								11.9012	1.42408	4.95041	3.20418	1.62752
								12.6133	1.42408	5.18772	3.20418	1.62752
								12.6133	1.42408	5.28944	3.20418	1.62752
								12.715	1.42408	5.28944	3.25504	1.62752
								12.715	1.49183	5.49288	3.25504	1.62752
								13.071	1.49193	5.62847	3.25504	1.62752
								13.427	1.5258	5.62857	3.3059	1.62752
								13.7322	1.55967	6.30664	3.39063	1.62752
								13.7831	1.57666	6.37439	3.45848	1.67838
								14.2408	1.62752	6.57793	3.50934	1.67838
								14.546	1.62752	6.71352	3.50934	1.67838
								14.9528	1.62752	6.84921	3.50934	1.69537
								15.0546	1.64451	6.98481	3.52633	1.69537
								15.0546	1.67838	7.79847	3.5602	1.69537
								15.3597	1.69527	9.08695	3.61106	1.72924
								15.4614	1.69537	9.08695	3.66192	1.72924
								15.97	1.83096	9.90071	3.66192	1.72924
								16.1735	1.83096	10.2398	3.71278	1.72924
								16.4786	1.89881	10.6467	3.76364	1.76321
								16.8855	2.11913		3.76364	1.7801
								17.6993	2.23784		3.8145	1.7801
								18.0044	2.37353		3.8145	1.7801
								18.2079	2.44128		3.91622	1.83096
								18.2079	3.45848		3.91622	1.83096
								18.6486	3.71278		3.93311	1.83096
								19.0216	5.18772		3.96708	1.83096
								19.632	5.49288		4.0688	1.89871
								20.0388	5.50987		4.0688	1.89871
								20.1406	5.79804		4.0688	1.89881
								20.2931	5.89976		4.11966	1.93268
								20.8526	6.17095		4.27224	1.93268
								21.5646			4.3231	1.93268
								23.4973			4.40783	1.93268
								23.8025			4.47568	1.93268
								24.6162			4.52654	1.93268
								25.1588			4.52654	1.93268
								27.973			4.5774	2.0344
								29.7022			4.5774	2.0344
								34.9917			4.61127	2.08526
								45.4688			4.67912	2.13612
								47.605			4.8317	2.23784
											4.8317	2.23784
											4.88256	2.23784
											4.98428	2.23784
											4.98428	2.23784
											5.03514	2.23784
											5.03514	2.23784
											5.13686	2.23784
											5.22159	2.30569
											5.28944	2.33956
											5.28944	2.37343
											5.3403	2.37353
											5.39116	2.44128
											5.44202	2.49214
											5.44202	2.50913
											5.44202	2.50913
											5.44202	2.543
											5.54374	2.57687
											5.57761	2.57697
											5.74718	2.64472
											5.79804	2.64472
											5.89976	2.64472
											5.95062	2.71257
											6.05234	2.74644
											6.05234	2.74644
											6.05234	2.78041
											6.15406	2.7973
											6.25578	2.89902
											6.30664	2.89902
											6.3575	2.91601
											6.3575	3.00074
											6.45922	3.0516
											6.51008	3.0516
											6.6118	3.11945
											6.76438	3.35676
											6.81524	3.49245
											6.8661	3.71278
											7.06954	3.76364
											7.17126	3.8145
											7.27298	3.86536
											7.32384	3.86536
											7.57814	4.0688
											7.78158	4.42482
											7.98502	4.50955
											8.00201	4.5774
											8.1376	4.67912
											9.30738	4.88256
											9.76512	5.086
											9.83287	5.49288
											9.9177	5.62847
											10.0703	5.62847
											11.0875	5.64546
											11.9012	5.69632
											12.5454	6.20492
											13.1219	6.91696
											15.7157	26.9558
											16.5804
											19.2759
											21.0052
											22.7174
											25.1248
											37.789
											50.2497
											57.6752
											78.4261
