# Supplementary material for: Comparative analysis of two Caenorhabditis elegans kinesins KLP-6 and UNC-104 reveals a common and distinct activation mechanism in kinesin-3
Source: eLife. 2024 Jan 11;12:RP89040. doi: 10.7554/eLife.89040 (PMC10945585; doi:10.7554/eLife.89040)
Supplement: Figure 3—source data 1. — The result of single molecule assays using KLP-6 (1–390)LZ. Velocity and run length are shown. Dot plots are shown in Figure 3D and E, respectively. [file elife-89040-fig3-data1.xlsx]

## Sheet: Fig.3
	Velocity (μm/sec)			Run length (μm)
	KLP-6(1-390)LZ			KLP-6(1-390)LZ
n	642		n	642
Average	0.258502		Median	1.76
SD	0.117978
Data	0.00692641		Data	0.32
	0.0231325			0.32
	0.0265285			0.4
	0.02816			0.56
	0.0315646			0.56
	0.032			0.64
	0.0321893			0.64
	0.0332468			0.64
	0.0338211			0.64
	0.0350685			0.64
	0.0355556			0.64
	0.0370526			0.64
	0.0372093			0.64
	0.0372537			0.64
	0.0393736			0.64
	0.04			0.72
	0.0441379			0.72
	0.0449123			0.72
	0.0455556			0.72
	0.0457143			0.72
	0.0457143			0.72
	0.0465455			0.72
	0.0468293			0.72
	0.0473239			0.72
	0.0481203			0.8
	0.0488889			0.8
	0.0488889			0.8
	0.049009			0.8
	0.0506329			0.8
	0.0512			0.8
	0.0516129			0.8
	0.0516923			0.8
	0.0518919			0.8
	0.0525373			0.8
	0.0543396			0.8
	0.0556522			0.8
	0.0569863			0.85328
	0.0579528			0.85328
	0.0589474			0.88
	0.0591005			0.88
	0.0594286			0.88
	0.0602353			0.88
	0.0606897			0.88
	0.0613472			0.88
	0.0614141			0.88
	0.0634711			0.88
	0.064			0.88
	0.064			0.88
	0.064			0.88
	0.064			0.88
	0.064			0.88
	0.0655901			0.88
	0.0658824			0.88
	0.0665347			0.88
	0.0676923			0.88
	0.0685714			0.96
	0.0693976			0.96
	0.0702439			0.96
	0.0704207			0.96
	0.0704587			0.96
	0.0718367			0.96
	0.072381			0.96
	0.0729825			0.96
	0.0740136			0.96
	0.0742029			0.96
	0.0742849			0.96
	0.0745205			0.96
	0.075			0.96
	0.0752941			0.96
	0.0753486			0.96
	0.0754717			0.96
	0.076478			0.96
	0.0771609			0.96
	0.0781679			1.01344
	0.08			1.04
	0.08			1.04
	0.0800014			1.04
	0.0807767			1.04
	0.0814545			1.04
	0.0825806			1.04
	0.0825806			1.04
	0.082963			1.04
	0.0831638			1.04
	0.0833803			1.04
	0.0834783			1.04
	0.0836601			1.04
	0.0837131			1.04
	0.0837855			1.04
	0.0842105			1.04
	0.084898			1.04
	0.084898			1.04
	0.0855446			1.04
	0.0867797			1.04
	0.0869565			1.04
	0.0872727			1.12
	0.088			1.12
	0.0882759			1.12
	0.0911515			1.12
	0.0917333			1.12
	0.0924444			1.12
	0.0924444			1.12
	0.092562			1.12
	0.0931646			1.12
	0.0932039			1.12
	0.0946087			1.12
	0.0948148			1.12
	0.0954839			1.12
	0.0955556			1.12
	0.096			1.12
	0.0961576			1.12
	0.0981711			1.12
	0.0983007			1.12
	0.0984615			1.12
	0.0987234			1.12
	0.0987654			1.12
	0.0988235			1.2
	0.100392			1.2
	0.101053			1.2
	0.101053			1.2
	0.101587			1.2
	0.102857			1.2
	0.102857			1.2
	0.103226			1.2
	0.104615			1.2
	0.106667			1.2
	0.1088			1.2
	0.1088			1.2
	0.109714			1.2
	0.112281			1.2
	0.113548			1.2
	0.113846			1.2
	0.12			1.2
	0.12			1.2
	0.120656			1.2
	0.120755			1.2
	0.122105			1.2
	0.122553			1.2
	0.123077			1.2
	0.123944			1.2
	0.124444			1.2
	0.125714			1.2
	0.126061			1.2
	0.126316			1.2
	0.127123			1.22656
	0.128525			1.22656
	0.130612			1.22672
	0.131765			1.28
	0.137143			1.28
	0.143059			1.28
	0.145455			1.28
	0.152195			1.28
	0.152381			1.28
	0.152523			1.28
	0.154074			1.28
	0.154074			1.28
	0.16			1.28
	0.16			1.28
	0.163019			1.28
	0.168421			1.28
	0.173333			1.28
	0.177778			1.28
	0.179512			1.28
	0.1856			1.28
	0.192			1.28
	0.192			1.28
	0.193103			1.28
	0.194783			1.28
	0.195547			1.28
	0.195556			1.28
	0.196036			1.28
	0.198095			1.28
	0.2			1.28
	0.200685			1.28
	0.20129			1.36
	0.203636			1.36
	0.203636			1.36
	0.203636			1.36
	0.205714			1.36
	0.20898			1.36
	0.209088			1.36
	0.213333			1.36
	0.213333			1.36
	0.215			1.36
	0.216774			1.36
	0.218182			1.36
	0.218947			1.36
	0.218947			1.36
	0.219429			1.36
	0.22			1.36
	0.22069			1.36
	0.22153			1.36
	0.222222			1.36
	0.224			1.36
	0.224			1.36
	0.228571			1.36
	0.228571			1.36
	0.231111			1.44
	0.231489			1.44
	0.231724			1.44
	0.231724			1.44
	0.234667			1.44
	0.23652			1.44
	0.237419			1.44
	0.238298			1.44
	0.24			1.44
	0.24			1.44
	0.24			1.44
	0.24			1.44
	0.24			1.44
	0.24			1.44
	0.24			1.44
	0.24			1.44
	0.24381			1.44
	0.24381			1.44
	0.244211			1.44
	0.244364			1.44
	0.245312			1.44
	0.245581			1.44
	0.246154			1.44
	0.246857			1.44
	0.247273			1.44
	0.247273			1.49328
	0.247742			1.49344
	0.248889			1.52
	0.248889			1.52
	0.248889			1.52
	0.249756			1.52
	0.25			1.52
	0.250435			1.52
	0.251429			1.52
	0.251429			1.52
	0.251429			1.52
	0.253333			1.52
	0.253666			1.52
	0.253793			1.52
	0.253793			1.52
	0.256			1.52
	0.256			1.52
	0.256			1.52
	0.256			1.52
	0.256			1.52
	0.256			1.52
	0.256			1.52
	0.256744			1.52
	0.257143			1.52
	0.258462			1.52
	0.258462			1.52
	0.258462			1.54656
	0.259048			1.54672
	0.259701			1.6
	0.26			1.6
	0.261818			1.6
	0.261818			1.6
	0.261818			1.6
	0.262857			1.6
	0.262857			1.6
	0.263529			1.6
	0.264348			1.6
	0.264828			1.6
	0.265366			1.6
	0.265763			1.6
	0.266667			1.6
	0.266667			1.6
	0.266667			1.6
	0.266667			1.6
	0.266667			1.6
	0.266667			1.6
	0.266667			1.6
	0.266667			1.6
	0.268108			1.6
	0.268111			1.6
	0.268387			1.6
	0.2688			1.6
	0.269474			1.6
	0.269475			1.65344
	0.27			1.65344
	0.27			1.68
	0.270222			1.68
	0.270222			1.68
	0.270222			1.68
	0.270769			1.68
	0.270769			1.68
	0.270769			1.68
	0.270769			1.68
	0.270769			1.68
	0.271515			1.68
	0.274286			1.68
	0.274286			1.68
	0.274286			1.68
	0.274286			1.68
	0.275556			1.68
	0.275942			1.68
	0.276364			1.68
	0.276364			1.68
	0.276364			1.68
	0.277647			1.68
	0.277736			1.68
	0.27871			1.68
	0.278974			1.68
	0.279149			1.68
	0.28			1.68
	0.28			1.68
	0.28			1.70672
	0.28			1.76
	0.281212			1.76
	0.2816			1.76
	0.2816			1.76
	0.282353			1.76
	0.282353			1.76
	0.282353			1.76
	0.282353			1.76
	0.282353			1.76
	0.282353			1.76
	0.283429			1.76
	0.283429			1.76
	0.284444			1.76
	0.284444			1.76
	0.284444			1.76
	0.285091			1.76
	0.285405			1.76
	0.285714			1.76
	0.286316			1.76
	0.286316			1.76
	0.286316			1.76
	0.286316			1.76
	0.286316			1.76
	0.286316			1.76
	0.286881			1.81328
	0.287179			1.81328
	0.287347			1.81328
	0.288			1.84
	0.288			1.84
	0.288			1.84
	0.288			1.84
	0.288			1.84
	0.288			1.84
	0.289032			1.84
	0.289032			1.84
	0.289524			1.84
	0.289524			1.84
	0.289554			1.84
	0.29			1.84
	0.290895			1.84
	0.290909			1.84
	0.292174			1.84
	0.292174			1.84
	0.293333			1.84
	0.293333			1.84
	0.293333			1.86672
	0.293333			1.92
	0.293333			1.92
	0.293333			1.92
	0.293333			1.92
	0.293333			1.92
	0.293333			1.92
	0.293647			1.92
	0.2944			1.92
	0.2944			1.92
	0.294545			1.92
	0.295385			1.92
	0.295385			1.92
	0.295407			1.92
	0.296296			1.92
	0.296296			1.92
	0.296585			1.92
	0.297143			1.92
	0.297143			1.92
	0.298667			1.92
	0.298667			1.92
	0.298667			1.92
	0.299315			1.92
	0.299963			1.97328
	0.3			1.97344
	0.3			2
	0.3			2
	0.3			2
	0.3			2
	0.300408			2
	0.300606			2
	0.300606			2
	0.301176			2
	0.301176			2
	0.301176			2
	0.301176			2
	0.301176			2
	0.301176			2
	0.301714			2
	0.301714			2
	0.302222			2
	0.302222			2
	0.303158			2
	0.303158			2
	0.303174			2
	0.304			2
	0.304			2.08
	0.304571			2.08
	0.304762			2.08
	0.305108			2.08
	0.305455			2.08
	0.305455			2.08
	0.305455			2.08
	0.305778			2.08
	0.306087			2.08
	0.306087			2.13328
	0.306087			2.16
	0.30664			2.16
	0.3072			2.16
	0.3072			2.16
	0.307692			2.16
	0.307692			2.16
	0.307692			2.16
	0.308148			2.16
	0.308571			2.16
	0.308571			2.16
	0.308571			2.16
	0.309333			2.16
	0.310303			2.16
	0.310588			2.16
	0.311111			2.16
	0.312544			2.18656
	0.313043			2.18656
	0.313043			2.18672
	0.314188			2.24
	0.314839			2.24
	0.319972			2.24
	0.32			2.24
	0.32			2.24
	0.32			2.24
	0.32			2.24
	0.32			2.24
	0.32			2.24
	0.32			2.24
	0.32			2.24
	0.32			2.24
	0.32			2.24
	0.32			2.32
	0.32			2.32
	0.32			2.32
	0.32			2.32
	0.32			2.32
	0.32			2.32
	0.32			2.32
	0.32			2.32
	0.32			2.32
	0.32			2.32
	0.32			2.32
	0.32			2.32
	0.32			2.32
	0.32			2.34656
	0.32			2.34672
	0.32			2.4
	0.32			2.4
	0.32			2.4
	0.32			2.4
	0.32			2.4
	0.32			2.4
	0.32			2.4
	0.32			2.4
	0.32			2.4
	0.32			2.4
	0.32			2.4
	0.325517			2.4
	0.327273			2.4
	0.328421			2.4
	0.328649			2.4
	0.32888			2.4
	0.329143			2.48
	0.331429			2.48
	0.333333			2.48
	0.333913			2.48
	0.333913			2.48
	0.334545			2.48
	0.334545			2.48
	0.334545			2.56
	0.335238			2.56
	0.336288			2.56
	0.336394			2.56
	0.33641			2.56
	0.336842			2.56
	0.336842			2.56
	0.336842			2.56
	0.337778			2.56
	0.337778			2.64
	0.337778			2.64
	0.338286			2.64
	0.338824			2.64
	0.338824			2.64
	0.338824			2.64
	0.339404			2.64
	0.34			2.64
	0.34			2.64
	0.340317			2.64
	0.340645			2.64
	0.34087			2.64
	0.341312			2.64
	0.341333			2.64
	0.341333			2.64
	0.341333			2.64
	0.342115			2.72
	0.342857			2.72
	0.342857			2.72
	0.342857			2.72
	0.342869			2.72
	0.343415			2.72
	0.344615			2.72
	0.344615			2.72
	0.344627			2.72
	0.3456			2.72
	0.346667			2.77328
	0.346667			2.77328
	0.346667			2.8
	0.346667			2.8
	0.347826			2.8
	0.349091			2.8
	0.349091			2.8
	0.349091			2.8
	0.349091			2.88
	0.349091			2.88
	0.350189			2.88
	0.35122			2.88
	0.352			2.88
	0.352			2.88
	0.352			2.88
	0.352653			2.88
	0.353703			2.88
	0.355556			2.96
	0.355556			2.96
	0.355556			2.96
	0.355556			2.96
	0.356923			2.96
	0.357647			2.96
	0.357647			2.96
	0.357647			2.96
	0.3584			2.96
	0.358788			2.96
	0.358788			2.98656
	0.358788			3.04
	0.36			3.04
	0.36			3.04
	0.360009			3.04
	0.362667			3.04
	0.363636			3.04
	0.363636			3.04
	0.364444			3.04
	0.365714			3.04
	0.365714			3.04
	0.365714			3.04
	0.365714			3.12
	0.368			3.12
	0.369259			3.12
	0.372364			3.12
	0.37332			3.12
	0.373333			3.12
	0.373333			3.12
	0.373333			3.12
	0.373333			3.2
	0.373333			3.2
	0.376471			3.2
	0.378182			3.28
	0.378182			3.28
	0.378182			3.28
	0.378182			3.28
	0.378182			3.28
	0.38			3.28
	0.38			3.30672
	0.38			3.36
	0.38			3.36
	0.380952			3.36
	0.380952			3.36
	0.380952			3.44
	0.384			3.44
	0.384			3.44
	0.384			3.44
	0.384			3.44
	0.384			3.46672
	0.384			3.52
	0.387091			3.52
	0.388571			3.6
	0.388571			3.6
	0.389565			3.6
	0.391111			3.6
	0.391111			3.6
	0.391111			3.6
	0.391111			3.6
	0.392258			3.6
	0.392258			3.6
	0.392727			3.62656
	0.393143			3.68
	0.393846			3.68
	0.393846			3.68
	0.393846			3.68
	0.39619			3.68
	0.3968			3.68
	0.4			3.76
	0.4			3.76
	0.4			3.84
	0.403475			3.84
	0.404211			3.92
	0.405333			3.92
	0.407273			3.92
	0.407273			3.92
	0.408889			4
	0.411429			4
	0.413333			4
	0.414118			4
	0.416			4.08
	0.418433			4.16
	0.42			4.21328
	0.42			4.32
	0.426667			4.32
	0.426667			4.32
	0.426667			4.4
	0.432941			4.4
	0.433011			4.64
	0.433548			4.64
	0.436364			4.72
	0.436364			4.72
	0.436364			4.88
	0.44			4.88
	0.441905			4.96
	0.443077			4.96
	0.444444			5.04
	0.457143			5.12
	0.4736			5.2
	0.474839			5.2
	0.48			5.28
	0.48			5.36
	0.48			5.44
	0.488421			5.44
	0.492308			5.52
	0.492308			5.6
	0.497778			6.08
	0.506667			6.24
	0.506667			6.24
	0.509091			6.4
	0.512			6.48
	0.512			6.64
	0.516923			7.2
	0.5248			7.84
	0.525714			8.32
	0.533333			9.52
	0.68			13.5733
