# Supplementary material for: Comparative analysis of two Caenorhabditis elegans kinesins KLP-6 and UNC-104 reveals a common and distinct activation mechanism in kinesin-3
Source: eLife. 2024 Jan 11;12:RP89040. doi: 10.7554/eLife.89040 (PMC10945585; doi:10.7554/eLife.89040)
Supplement: Figure 4—source data 1. — The result of single molecule assays using KLP-6 (1–587) and KLP-6 (1–587)(D458A). Landing rate and dwell time are shown. Dot plots are shown in Figure 4E and F, respectively. [file elife-89040-fig4-data1.xlsx]

## Sheet: Fig.4
	Landing rate (/μm/sec)				Dwell time (sec)
	KLP-6(1-587)	KLP-6(1-587)(D458A)			KLP-6(1-587)	KLP-6(1-587)(D458A)
n	33	33		n	338	351
Median	0.00345872	0.013083		Median	0.61032	0.7629
Data	0.00264841	0.0119889		Data	0.15258	0.135593
	0.00375226	0.00874636			0.20344	0.20344
	0.0021944	0.013083			0.20344	0.2543
	0.00288918	0.0180715			0.20344	0.2543
	0.00163413	0.0146463			0.2543	0.2543
	0.00345872	0.0101933			0.271287	0.2543
	0.00264588	0.0104584			0.271287	0.30516
	0.00532926	0.0171185			0.30516	0.30516
	0.00422625	0.0118377			0.30516	0.30516
	0.00648779	0.010993			0.30516	0.339033
	0.00286894	0.0188204			0.30516	0.339033
	0.00372383	0.0174942			0.30516	0.339033
	0.00388881	0.0172635			0.339033	0.339033
	0.000835962	0.0220502			0.339033	0.35602
	0.00107795	0.0104681			0.339033	0.35602
	0.00197048	0.0194999			0.339033	0.35602
	0.00294591	0.0154625			0.339033	0.35602
	0.00554695	0.0075127			0.339033	0.35602
	0.00330142	0.024179			0.339134	0.35602
	0.0039927	0.00968814			0.339134	0.40688
	0.00332817	0.0156743			0.35602	0.40688
	0.00521336	0.0129664			0.35602	0.40688
	0.00349109	0.0083407			0.35602	0.40688
	0.00211873	0.0152844			0.35602	0.40688
	0.00325187	0.0128654			0.35602	0.40688
	0.00205955	0.0127598			0.372906	0.40688
	0.00842366	0.0158082			0.372906	0.40688
	0.0049286	0.0175552			0.372906	0.40688
	0.00415157	0.0168128			0.373007	0.40688
	0.00271572	0.0130334			0.373007	0.40688
	0.0075941	0.0132492			0.373007	0.40688
	0.00515207	0.0114476			0.40688	0.40688
	0.00415157	0.00507495			0.40688	0.40688
					0.40688	0.45774
					0.40688	0.45774
					0.40688	0.45774
					0.40688	0.45774
					0.40688	0.45774
					0.40688	0.45774
					0.40688	0.45774
					0.40688	0.45774
					0.40688	0.45774
					0.40688	0.45774
					0.40688	0.45774
					0.40688	0.45774
					0.40688	0.474626
					0.40688	0.474626
					0.40688	0.474626
					0.40688	0.474626
					0.40688	0.474727
					0.40688	0.474727
					0.40688	0.474727
					0.440753	0.474727
					0.440753	0.474727
					0.440753	0.474727
					0.440753	0.474727
					0.440753	0.474727
					0.440854	0.474727
					0.440854	0.5086
					0.45774	0.5086
					0.45774	0.5086
					0.45774	0.5086
					0.45774	0.5086
					0.45774	0.5086
					0.45774	0.5086
					0.45774	0.5086
					0.45774	0.5086
					0.45774	0.5086
					0.45774	0.5086
					0.45774	0.5086
					0.45774	0.5086
					0.45774	0.542473
					0.45774	0.542473
					0.45774	0.542473
					0.474626	0.542473
					0.474626	0.542473
					0.474626	0.542473
					0.474626	0.542574
					0.474626	0.542574
					0.474626	0.542574
					0.474626	0.55946
					0.474626	0.55946
					0.474727	0.55946
					0.474727	0.55946
					0.474727	0.55946
					0.474727	0.55946
					0.474727	0.55946
					0.474727	0.55946
					0.474727	0.55946
					0.474727	0.55946
					0.474727	0.55946
					0.474727	0.55946
					0.474727	0.55946
					0.491613	0.593333
					0.5086	0.61032
					0.5086	0.61032
					0.5086	0.61032
					0.5086	0.61032
					0.5086	0.61032
					0.5086	0.61032
					0.5086	0.61032
					0.5086	0.61032
					0.5086	0.61032
					0.5086	0.61032
					0.5086	0.61032
					0.5086	0.61032
					0.5086	0.61032
					0.5086	0.61032
					0.542473	0.61032
					0.542473	0.61032
					0.542473	0.61032
					0.542473	0.61032
					0.542473	0.61032
					0.542473	0.61032
					0.542473	0.61032
					0.542473	0.61032
					0.542473	0.61032
					0.542473	0.61032
					0.542473	0.61032
					0.542574	0.61032
					0.542574	0.61032
					0.542574	0.61032
					0.542574	0.61032
					0.542574	0.61032
					0.542574	0.61032
					0.55946	0.61032
					0.55946	0.61032
					0.55946	0.66118
					0.55946	0.66118
					0.55946	0.66118
					0.55946	0.66118
					0.55946	0.66118
					0.55946	0.66118
					0.55946	0.66118
					0.55946	0.66118
					0.55946	0.66118
					0.55946	0.66118
					0.55946	0.66118
					0.55946	0.66118
					0.55946	0.66118
					0.55946	0.66118
					0.55946	0.66118
					0.55946	0.66118
					0.576447	0.66118
					0.576447	0.66118
					0.576447	0.678066
					0.576447	0.678066
					0.593333	0.678066
					0.61032	0.678066
					0.61032	0.678167
					0.61032	0.678167
					0.61032	0.678167
					0.61032	0.678167
					0.61032	0.678167
					0.61032	0.678167
					0.61032	0.678167
					0.61032	0.695053
					0.61032	0.71204
					0.61032	0.71204
					0.61032	0.71204
					0.61032	0.71204
					0.61032	0.71204
					0.61032	0.71204
					0.61032	0.71204
					0.61032	0.71204
					0.61032	0.745913
					0.61032	0.745913
					0.61032	0.745913
					0.61032	0.745913
					0.61032	0.745913
					0.61032	0.745913
					0.61032	0.746014
					0.61032	0.746014
					0.61032	0.746014
					0.644193	0.7629
					0.644294	0.7629
					0.644294	0.7629
					0.66118	0.7629
					0.66118	0.7629
					0.66118	0.7629
					0.66118	0.7629
					0.66118	0.7629
					0.66118	0.7629
					0.66118	0.7629
					0.66118	0.7629
					0.66118	0.81376
					0.66118	0.81376
					0.678066	0.81376
					0.678066	0.81376
					0.678066	0.81376
					0.678066	0.81376
					0.678066	0.81376
					0.678066	0.81376
					0.678066	0.81376
					0.678167	0.81376
					0.678167	0.81376
					0.678167	0.81376
					0.678167	0.81376
					0.678167	0.81376
					0.678167	0.81376
					0.71204	0.81376
					0.71204	0.81376
					0.71204	0.81376
					0.71204	0.81376
					0.71204	0.81376
					0.71204	0.81376
					0.71204	0.81376
					0.71204	0.830747
					0.71204	0.86462
					0.71204	0.86462
					0.745913	0.86462
					0.745913	0.86462
					0.745913	0.86462
					0.745913	0.881506
					0.745913	0.881506
					0.745913	0.881506
					0.746014	0.881506
					0.746014	0.881607
					0.746014	0.881607
					0.746014	0.881607
					0.746014	0.881607
					0.7629	0.881607
					0.7629	0.91548
					0.7629	0.91548
					0.7629	0.91548
					0.7629	0.91548
					0.7629	0.91548
					0.7629	0.91548
					0.7629	0.91548
					0.7629	0.91548
					0.7629	0.91548
					0.7629	0.949353
					0.779887	0.949353
					0.779887	0.949353
					0.779887	0.949353
					0.81376	0.949353
					0.81376	0.949353
					0.81376	0.949353
					0.81376	0.949353
					0.81376	0.949353
					0.81376	0.949454
					0.81376	0.949454
					0.81376	0.949454
					0.81376	0.949454
					0.81376	0.96634
					0.81376	0.96634
					0.81376	0.96634
					0.81376	0.96634
					0.81376	1.0172
					0.81376	1.0172
					0.81376	1.0172
					0.81376	1.0172
					0.81376	1.0172
					0.81376	1.0172
					0.86462	1.06806
					0.86462	1.06806
					0.86462	1.06806
					0.86462	1.06806
					0.86462	1.06806
					0.881506	1.06806
					0.881607	1.08495
					0.881607	1.08495
					0.881607	1.08505
					0.898493	1.08505
					0.898493	1.08505
					0.91548	1.08505
					0.91548	1.11892
					0.91548	1.11892
					0.91548	1.11892
					0.91548	1.11892
					0.91548	1.15279
					0.949353	1.15289
					0.949353	1.16978
					0.949353	1.16978
					0.949353	1.16978
					0.949353	1.22064
					0.949353	1.22064
					0.96634	1.22064
					0.96634	1.22064
					0.96634	1.22064
					0.96634	1.22064
					1.0172	1.22064
					1.0172	1.2715
					1.0172	1.2715
					1.0172	1.2715
					1.0172	1.28849
					1.0172	1.28849
					1.05107	1.28849
					1.06806	1.28849
					1.08505	1.32236
					1.08505	1.35623
					1.11892	1.35633
					1.11892	1.35633
					1.15279	1.35633
					1.15279	1.37322
					1.16978	1.42408
					1.22064	1.42408
					1.2715	1.42408
					1.28849	1.42408
					1.28849	1.42408
					1.28849	1.47494
					1.32236	1.47494
					1.35623	1.49183
					1.35623	1.49183
					1.35633	1.55967
					1.39021	1.57666
					1.42408	1.62752
					1.42408	1.62752
					1.42408	1.62752
					1.42408	1.62752
					1.42408	1.64451
					1.49183	1.67838
					1.49193	1.67838
					1.5258	1.69527
					1.55967	1.72924
					1.57666	1.72924
					1.62752	1.76321
					1.62752	1.7801
					1.62752	1.7801
					1.64451	1.83096
					1.67838	1.83096
					1.69527	1.83096
					1.69537	1.88182
					1.83096	1.96655
					1.83096	1.96655
					1.89881	1.98354
					2.11913	2.08526
					2.23784	2.10225
					2.37353	2.18698
					2.44128	2.18698
					3.45848	2.30569
					3.71278	2.33956
					5.18772	2.39042
					5.49288	2.50913
					5.50987	2.543
					5.79804	2.71257
					5.89976	2.7973
					6.17095	2.84816
						2.84816
						2.94988
						2.98385
						3.3059
						3.39073
						3.5602
						3.8145
						3.86536
						4.22138
						4.22138
						4.47568
						4.52654
						6.64577
