# Supplementary material for: Comparative analysis of two Caenorhabditis elegans kinesins KLP-6 and UNC-104 reveals a common and distinct activation mechanism in kinesin-3
Source: eLife. 2024 Jan 11;12:RP89040. doi: 10.7554/eLife.89040 (PMC10945585; doi:10.7554/eLife.89040)
Supplement: Figure 5—figure supplement 2—source data 1. — The property of microtubules and axonemes are compared using UNC-104(1–653). Landing rate is shown. A dot plot is shown in Figure 5—figure supplement 2B. [file elife-89040-fig5-figsupp2-data1.xlsx]

## Sheet: Fig.5 Supplement 2
	Landing rate (/μm/sec)
	UNC-104(1-653) on microtubules	UNC-104(1-653) on axonemes
n	45	46
Median	0.00815393	0.000991019
Data	0.00370778	0.000975289
	0.0125908	0
	0.00650575	0
	0.00650575	0
	0.00991019	0.000975289
	0.00267144	0.00201453
	0.00117035	0.000975289
	0.00918116	0.00263328
	0.00582093	0.00168337
	0.0150194	0.00288015
	0.0134186	0.00178096
	0.0103639	0.000930957
	0.00857347	0.000903576
	0.00715843	0.000797963
	0.0171469	0.00256013
	0.0101002	0.00115931
	0.00522921	0.00113784
	0.0060768	0.0013654
	0.0104903	0.0019201
	0.00722861	0
	0.00544433	0
	0.00351104	0.00271073
	0.0171469	0
	0.0111042	0.00201453
	0.00789984	0.00102405
	0.00620069	0.00104141
	0.0064677	0.0031781
	0.0178744	0
	0.00209465	0.00201453
	0.00689668	0
	0.00840801	0.00180715
	0.00711447	0
	0.00366825	0
	0.00124128	0.00211873
	0.00178096	0.000797963
	0.0170675	0.00122886
	0.00655394	0
	0.0108887	0.000507795
	0.0192583	0.00115931
	0.0177862	0
	0.0087776	0.00105937
	0.0076804	0.000991019
	0.0172593	0
	0.0147464	0
	0.0172472	0.00102405
		0
