# Supplementary material for: Comparative analysis of two Caenorhabditis elegans kinesins KLP-6 and UNC-104 reveals a common and distinct activation mechanism in kinesin-3
Source: eLife. 2024 Jan 11;12:RP89040. doi: 10.7554/eLife.89040 (PMC10945585; doi:10.7554/eLife.89040)
Supplement: Figure 5—source data 1. — The result of single molecule assays using UNC-104(1–653) and UNC-104(1–653)(E412K). Landing rate, run length, and velocity are shown. Dot plots are shown in Figure 5E, F, and G, respectively. [file elife-89040-fig5-data1.xlsx]

## Sheet: Fig.5
	Landing rate (/μm/sec)				Run length (μm)				Velocity (μm/sec)
	UNC-104(1-653)	UNC-104(1-653)(E412K)			UNC-104(1-653)	UNC-104(1-653)(E412K)			UNC-104(1-653)	UNC-104(1-653)(E412K)
n	31	30		n	603	624		n	603	624
Median	0.00447287	0.0365301		Median	1.08	1.54672		Average	1.96292	1.95367
								SD	0.487703	0.438041
Data	0.00547267	0.0293366		Data	0.37328	0.64		Data	0.807708	0.858009
	0.00378759	0.0276927			0.37344	0.56			0.846971	0.917551
	0.00444168	0.0344352			0.4	0.56			0.873859	0.917551
	0.00570544	0.0428995			0.4	0.85328			0.913836	1.00666
	0.00762086	0.0601806			0.42672	2.02672			0.943767	1.0306
	0.00412678	0.0250324			0.42672	1.65328			1.04064	1.06002
	0.00399381	0.0258511			0.42672	1.17328			1.04863	1.08142
	0.00311801	0.0496272			0.44	2.34672			1.10683	1.08144
	0.00160986	0.0440402			0.48	0.72			1.12353	1.08896
	0.00504026	0.0284289			0.48	1.49344			1.12353	1.10117
	0.00447287	0.0283327			0.48	2.4			1.12353	1.10599
	0.00513739	0.0375127			0.48	0.53328			1.14178	1.12358
	0.00130268	0.0303783			0.48	0.53344			1.14394	1.12368
	0.00154574	0.0439637			0.53328	1.84			1.14396	1.13055
	0.00633435	0.0342988			0.53328	1.81328			1.14396	1.1626
	0.00301419	0.0297675			0.53344	0.64			1.14396	1.17956
	0.00519238	0.0332817			0.53344	1.33328			1.14416	1.19158
	0.00571564	0.0355476			0.53344	1.06672			1.17971	1.20997
	0.00471064	0.0346316			0.53344	1.49344			1.17971	1.22349
	0.00867841	0.0248387			0.53344	0.74672			1.20284	1.22349
	0.00406609	0.0594611			0.56	3.2			1.21029	1.24182
	0.00465108	0.0489463			0.56	1.86672			1.22323	1.25121
	0.00476714	0.0486652			0.56	5.81328			1.22323	1.25145
	0.0064677	0.0505894			0.56	0.85328			1.22333	1.25821
	0.00321845	0.0321746			0.58656	1.28			1.2234	1.25836
	0.00415157	0.0425972			0.58656	2.88			1.2234	1.25836
	0.00160636	0.0492896			0.58672	0.85344			1.22349	1.25864
	0.00411144	0.0488688			0.58672	6.29328			1.22349	1.26263
	0.00791599	0.0550502			0.58672	4.10672			1.22766	1.27496
	0.00499538	0.041396			0.6	0.96			1.23929	1.28684
	0.00258708				0.64	1.44			1.25821	1.28696
					0.64	8.26672			1.25836	1.30379
					0.64	4.48			1.25836	1.30818
					0.64	0.53328			1.25836	1.31066
					0.64	3.41344			1.25864	1.32459
					0.64	2.29344			1.25864	1.32627
					0.64	1.17328			1.2733	1.33084
					0.64	1.17328			1.27334	1.331
					0.64	0.64			1.28684	1.34814
					0.64	0.64			1.28696	1.34814
					0.64	0.64			1.29338	1.34843
					0.64	0.64			1.29538	1.34843
					0.64	1.38656			1.31066	1.36311
					0.64	1.38672			1.31079	1.36327
					0.64	2.13328			1.31105	1.36777
					0.64	0.74656			1.33095	1.37596
					0.64	0.74656			1.34814	1.37622
					0.64	0.74672			1.34824	1.37625
					0.64	2.66656			1.34824	1.37972
					0.64	0.8			1.34824	1.38781
					0.64	0.85328			1.34843	1.39809
					0.64	1.70656			1.34843	1.39809
					0.64	1.81328			1.36322	1.40729
					0.64	0.48			1.36327	1.41537
					0.64	0.96			1.36998	1.41558
					0.64	0.96			1.37622	1.41558
					0.64	0.96			1.37633	1.41579
					0.64	1.52			1.37633	1.42314
					0.64	2.08			1.37633	1.42656
					0.64	4.16			1.37651	1.42666
					0.64	1.06656			1.38419	1.42987
					0.64	1.06672			1.39809	1.43009
					0.64	1.06672			1.39809	1.43009
					0.64	1.65328			1.39809	1.43403
					0.68	1.70672			1.39809	1.43825
					0.69328	8.21328			1.39817	1.45048
					0.69328	1.28			1.39817	1.45189
					0.69328	1.28			1.39835	1.45206
					0.69328	2.61344			1.39835	1.45435
					0.69328	1.04			1.41558	1.46059
					0.69344	1.49328			1.41565	1.46803
					0.69344	0.74672			1.42987	1.46819
					0.69344	1.6			1.42987	1.47459
					0.72	1.70656			1.42995	1.48037
					0.72	8.53344			1.43009	1.48046
					0.72	1.81328			1.4305	1.48552
					0.72	1.92			1.4418	1.49012
					0.72	1.6			1.44187	1.49804
					0.72	8.85328			1.44187	1.50062
					0.72	1.33344			1.44553	1.51251
					0.72	2.77328			1.44714	1.51466
					0.72	1.70656			1.45189	1.52518
					0.72	3.41328			1.45189	1.52526
					0.72	3.52			1.45195	1.52673
					0.72	1.78672			1.45195	1.5274
					0.74656	4.10672			1.4585	1.53311
					0.74656	7.30672			1.46038	1.5503
					0.74656	3.94672			1.46054	1.55199
					0.74656	0.42656			1.46071	1.57236
					0.74656	1.06656			1.46447	1.57271
					0.74656	1.17328			1.46808	1.57273
					0.74656	2.13328			1.46819	1.57283
					0.74656	0.58672			1.47464	1.57295
					0.74672	0.74672			1.47473	1.57295
					0.74672	0.90656			1.49437	1.57295
					0.74672	1.49344			1.49804	1.57295
					0.74672	0.74672			1.50145	1.57295
					0.74672	2.34672			1.50145	1.57295
					0.74672	0.85328			1.5125	1.57295
					0.74672	0.88			1.51469	1.57295
					0.74672	1.44			1.51821	1.57295
					0.74672	0.64			1.52218	1.57295
					0.74672	0.96			1.57247	1.57295
					0.74672	2.34672			1.57265	1.57295
					0.74672	0.64			1.57286	1.57295
					0.74672	1.6			1.57295	1.57295
					0.8	0.64			1.57295	1.57295
					0.8	0.96			1.57295	1.57295
					0.8	2.56			1.57295	1.57295
					0.8	1.33328			1.57295	1.57295
					0.8	0.56			1.57295	1.57295
					0.8	0.42672			1.57295	1.57295
					0.8	1.12			1.57295	1.57295
					0.8	1.12			1.57295	1.57295
					0.8	2.45328			1.57295	1.57295
					0.8	1.70672			1.57295	1.57295
					0.8	1.49328			1.57295	1.57295
					0.8	1.17328			1.57295	1.57295
					0.8	0.90672			1.57295	1.57295
					0.8	1.70656			1.57295	1.57295
					0.8	1.06656			1.57295	1.57295
					0.8	0.53328			1.57295	1.57295
					0.8	1.49344			1.57295	1.57311
					0.8	1.06672			1.57295	1.57318
					0.8	1.06672			1.57295	1.57318
					0.8	0.85344			1.57295	1.57324
					0.8	0.69344			1.57295	1.57331
					0.8	0.42672			1.57295	1.57354
					0.8	4.58672			1.57295	1.59149
					0.8	3.84			1.57295	1.59508
					0.8	3.25344			1.57295	1.59921
					0.8	3.2			1.57295	1.59958
					0.8	3.14672			1.57295	1.60004
					0.8	4.08			1.57295	1.6044
					0.84	2.13328			1.57295	1.61324
					0.84	4.21328			1.57295	1.61376
					0.84	1.92			1.57295	1.61784
					0.84	5.70656			1.57295	1.61832
					0.84	6.88			1.57295	1.62327
					0.85328	6.66672			1.57295	1.62497
					0.85328	1.65344			1.57295	1.62548
					0.85328	3.2			1.57295	1.62713
					0.85328	1.6			1.57295	1.62713
					0.85328	6.4			1.57295	1.62717
					0.85328	1.54672			1.57295	1.62924
					0.85328	2.66672			1.57295	1.63852
					0.85328	2.45344			1.57295	1.64448
					0.85328	4.58672			1.57307	1.64971
					0.85328	2.24			1.57311	1.65163
					0.85328	1.06672			1.57318	1.6559
					0.85328	1.06672			1.57324	1.6559
					0.85328	2.02656			1.57324	1.66024
					0.85328	4.85328			1.57331	1.66436
					0.85328	1.44			1.61223	1.66547
					0.85328	1.92			1.61235	1.66552
					0.85328	0.90672			1.63457	1.67114
					0.85328	0.90672			1.64437	1.67146
					0.85328	0.85328			1.64444	1.6777
					0.85328	2.50672			1.64444	1.6803
					0.85328	1.65328			1.64459	1.68131
					0.85328	0.8			1.64777	1.68518
					0.85328	4.69328			1.65573	1.68804
					0.85328	10.88			1.65573	1.68886
					0.85328	4.53328			1.66033	1.69241
					0.85328	1.49328			1.66537	1.69382
					0.85344	8.96			1.66547	1.69394
					0.85344	1.12			1.66547	1.69394
					0.85344	1.12			1.66567	1.69394
					0.85344	6.56			1.67085	1.69713
					0.85344	2.88			1.67116	1.69885
					0.85344	0.69328			1.6777	1.70389
					0.85344	2.08			1.67781	1.70402
					0.85344	2.08			1.67802	1.70402
					0.88	1.38672			1.68518	1.70409
					0.88	1.38672			1.6853	1.70409
					0.88	6.50672			1.68536	1.71337
					0.88	1.28			1.68554	1.71578
					0.88	3.84			1.68554	1.71594
					0.88	1.28			1.6938	1.71602
					0.88	1.28			1.70122	1.71602
					0.88	2.56			1.70389	1.71602
					0.88	3.09328			1.70402	1.72137
					0.88	2.45328			1.70402	1.72271
					0.88	1.84			1.70409	1.72275
					0.88	0.58672			1.70958	1.73005
					0.88	0.58672			1.71578	1.73005
					0.88	2.34656			1.7159	1.73007
					0.88	2.34672			1.71594	1.73019
					0.90656	0.88			1.71625	1.73024
					0.90656	5.86672			1.72282	1.73027
					0.90656	1.17344			1.73007	1.73057
					0.90656	8.16			1.7301	1.73138
					0.90656	4			1.7301	1.73484
					0.90672	3.41328			1.73024	1.73558
					0.90672	5.06656			1.73024	1.7375
					0.90672	3.36			1.73024	1.73852
					0.90672	2.24			1.73024	1.73861
					0.90672	4.37328			1.73024	1.74295
					0.92	4.37344			1.73057	1.74308
					0.92	1.06656			1.73852	1.74754
					0.92	0.8			1.73852	1.74772
					0.93328	1.06672			1.73861	1.7478
					0.96	2.13344			1.74281	1.7478
					0.96	1.06672			1.74754	1.7478
					0.96	1.06672			1.74772	1.7478
					0.96	1.06672			1.74772	1.7478
					0.96	2.13344			1.74772	1.7478
					0.96	1.06672			1.74772	1.7478
					0.96	1.06672			1.7478	1.7478
					0.96	0.53344			1.75444	1.74807
					0.96	0.53344			1.758	1.74807
					0.96	2.08			1.75808	1.75266
					0.96	1.54672			1.75808	1.75443
					0.96	6.08			1.75808	1.758
					0.96	3.94656			1.76149	1.76356
					0.96	8.88			1.76934	1.76361
					0.96	2.45328			1.76956	1.76482
					0.96	0.96			1.76956	1.76934
					0.96	0.96			1.76956	1.76934
					0.96	0.96			1.76956	1.76934
					0.96	0.96			1.76967	1.76934
					0.96	2.88			1.76967	1.76956
					0.96	0.96			1.7781	1.76967
					0.96	0.96			1.78262	1.76967
					0.96	0.96			1.78278	1.76967
					0.96	0.96			1.78278	1.76967
					0.96	0.96			1.78766	1.76967
					0.96	0.96			1.79741	1.76967
					0.96	0.96			1.79741	1.76967
					0.96	1.86672			1.79741	1.77584
					0.96	1.81328			1.79765	1.78262
					0.96	1.81328			1.79765	1.78262
					0.96	5.44			1.79765	1.78267
					0.96	1.81344			1.7978	1.78278
					0.96	0.85328			1.7978	1.79741
					0.96	2.98656			1.8023	1.79751
					0.96	1.70672			1.80889	1.79758
					0.96	1.28			1.81466	1.79765
					0.96	0.64			1.81494	1.79765
					0.98672	1.28			1.81508	1.79765
					0.98672	0.85344			1.81508	1.79813
					1	5.86656			1.81872	1.8023
					1	5.01328			1.82103	1.80314
					1.01328	1.65328			1.82131	1.80592
					1.01328	1.22672			1.83484	1.80915
					1.01328	2.02672			1.83504	1.81132
					1.01328	1.6			1.8351	1.81487
					1.01328	3.2			1.8351	1.81487
					1.01328	3.2			1.8351	1.81487
					1.01328	1.6			1.8351	1.81487
					1.01328	2.4			1.8351	1.81494
					1.01328	1.6			1.83523	1.81508
					1.01328	3.57328			1.83523	1.81693
					1.01344	2.34656			1.83523	1.82117
					1.01344	3.52			1.83523	1.82131
					1.01344	5.06656			1.83563	1.8223
					1.01344	3.09328			1.84642	1.82466
					1.01344	6.50656			1.85051	1.82758
					1.04	0.74656			1.85052	1.83484
					1.04	2.98672			1.85052	1.83514
					1.04	0.74672			1.85083	1.83523
					1.04	1.49344			1.8514	1.83523
					1.04	0.74672			1.8537	1.83523
					1.04	3.30656			1.85523	1.83996
					1.04	5.86672			1.85862	1.84066
					1.04	5.76			1.85894	1.84654
					1.04	2.13328			1.85894	1.85037
					1.04	1.06672			1.85894	1.85051
					1.04	3.2			1.86784	1.85052
					1.04	2.13328			1.87255	1.85053
					1.04	4.26656			1.87255	1.85053
					1.06656	1.06656			1.87259	1.85056
					1.06656	1.76			1.88396	1.8537
					1.06656	5.97344			1.88716	1.85443
					1.06656	3.14672			1.88744	1.85618
					1.06656	1.38656			1.88744	1.85862
					1.06656	1.38656			1.88753	1.85862
					1.06656	1.38656			1.88753	1.85862
					1.06656	1.38656			1.88753	1.85888
					1.06656	4.85328			1.88772	1.85889
					1.06656	1.70656			1.88772	1.86411
					1.06656	2.02656			1.89675	1.86772
					1.06656	2.02656			1.90998	1.86772
					1.06672	1.01328			1.91001	1.86789
					1.06672	2.02672			1.91001	1.86804
					1.06672	5.33344			1.91002	1.87259
					1.06672	1.65328			1.9138	1.8753
					1.06672	3.30672			1.91499	1.8755
					1.06672	1.65328			1.9224	1.87552
					1.06672	1.97328			1.9224	1.8774
					1.06672	3.89328			1.92249	1.88229
					1.06672	1.28			1.92249	1.88744
					1.06672	1.28			1.92249	1.88744
					1.06672	1.28			1.92249	1.88744
					1.06672	3.2			1.92249	1.8875
					1.06672	13.76			1.92266	1.88753
					1.06672	0.96			1.92266	1.88753
					1.06672	1.92			1.92266	1.88753
					1.06672	3.84			1.92266	1.88753
					1.08	1.92			1.93026	1.88753
					1.08	2.56			1.93052	1.88758
					1.08	2.56			1.93052	1.88758
					1.09328	1.6			1.93551	1.88761
					1.12	0.64			1.93574	1.88772
					1.12	1.86656			1.93588	1.89821
					1.12	1.54672			1.93592	1.90071
					1.12	2.77344			1.93593	1.90215
					1.12	4.16			1.93593	1.90217
					1.12	0.90672			1.93593	1.90998
					1.12	2.4			1.93596	1.91309
					1.12	8			1.94753	1.91823
					1.12	0.58656			1.94753	1.92214
					1.12	1.17328			1.95814	1.9224
					1.12	3.52			1.96603	1.92249
					1.12	1.17344			1.96603	1.92266
					1.12	4.96			1.96618	1.92481
					1.12	2.88			1.96618	1.93052
					1.12	1.44			1.96618	1.93052
					1.12	0.85328			1.96633	1.93551
					1.12	1.28			1.9664	1.93593
					1.12	3.41328			1.9664	1.93594
					1.12	0.85344			1.9664	1.93632
					1.12	5.65328			1.96707	1.93877
					1.14672	1.97344			1.97757	1.94007
					1.16	1.12			1.98328	1.94294
					1.16	2.50672			1.98328	1.94548
					1.16	9.44			1.98352	1.94692
					1.17328	1.38656			1.98688	1.94731
					1.17328	1.38656			1.98688	1.94731
					1.17328	1.38656			1.98698	1.94731
					1.17328	2.77344			1.99229	1.94753
					1.17328	2.16			1.99229	1.96019
					1.17328	0.53328			1.99261	1.96574
					1.17328	0.53328			1.99501	1.96574
					1.17328	1.06656			2.00146	1.96574
					1.17328	1.33328			2.00168	1.966
					1.17328	1.06672			2.00189	1.96603
					1.17328	1.6			2.00193	1.96618
					1.17328	1.6			2.00193	1.96618
					1.17328	0.8			2.00201	1.96618
					1.17328	2.4			2.00313	1.96618
					1.17344	0.8			2.00686	1.96618
					1.17344	0.8			2.00711	1.96618
					1.17344	3.73344			2.01351	1.9662
					1.17344	9.86672			2.02221	1.96621
					1.17344	1.33344			2.02221	1.96624
					1.17344	1.33328			2.02221	1.9663
					1.17344	1.06672			2.02221	1.9664
					1.2	1.06672			2.02221	1.9664
					1.2	1.06672			2.02236	1.9664
					1.2	4.16			2.02265	1.97883
					1.2	1.54656			2.03558	1.98306
					1.2	1.54672			2.03564	1.98326
					1.2	1.54672			2.03897	1.98326
					1.2	6.18672			2.04457	1.98334
					1.2	1.92			2.04483	1.98688
					1.2	1.28			2.04483	1.98698
					1.22656	1.28			2.04488	1.98698
					1.22656	1.28			2.04511	1.98698
					1.22656	2.29344			2.04535	1.98929
					1.22672	2.02656			2.05158	1.99229
					1.22672	4.26672			2.05637	1.99742
					1.22672	8			2.05679	1.99952
					1.22672	1.49328			2.05697	2.00168
					1.22672	1.12			2.05697	2.00193
					1.24	1.49328			2.05721	2.00195
					1.28	1.49328			2.05721	2.00195
					1.28	0.74672			2.06423	2.00244
					1.28	3.46672			2.06443	2.00477
					1.28	5.44			2.06462	2.00556
					1.28	2.96			2.06961	2.00686
					1.28	1.22656			2.06969	2.0097
					1.28	2.45328			2.07359	2.00983
					1.28	1.22672			2.07359	2.00996
					1.28	6.82672			2.07612	2.01341
					1.28	2.18656			2.07612	2.01517
					1.28	0.48			2.07853	2.02178
					1.28	0.96			2.08046	2.02221
					1.28	0.96			2.08046	2.02221
					1.28	0.96			2.09705	2.02221
					1.28	1.44			2.09705	2.02236
					1.28	0.96			2.09705	2.02265
					1.28	0.48			2.09713	2.02265
					1.28	0.96			2.09713	2.02265
					1.28	0.48			2.09713	2.02265
					1.28	3.92			2.09713	2.02827
					1.28	5.22672			2.09713	2.02832
					1.28	9.49328			2.09726	2.02886
					1.28	2.13344			2.09726	2.02977
					1.28	5.65344			2.09726	2.03338
					1.28	1.17328			2.09726	2.03572
					1.28	1.17344			2.09726	2.036
					1.28	6.56			2.09726	2.03653
					1.28	3.28			2.09726	2.03659
					1.28	1.86672			2.09726	2.03906
					1.28	1.38656			2.09726	2.04457
					1.28	2.77344			2.09726	2.04481
					1.32	1.38672			2.09726	2.04481
					1.33328	1.38672			2.09726	2.04481
					1.33328	0.69328			2.09726	2.04488
					1.33328	1.38672			2.09726	2.04511
					1.33328	1.36			2.09726	2.05693
					1.33328	1.36			2.09726	2.05693
					1.33328	1.81328			2.09737	2.05703
					1.33344	1.81344			2.09741	2.05721
					1.33344	0.90672			2.09752	2.05721
					1.33344	2.24			2.09752	2.06443
					1.33344	1.68			2.10717	2.06449
					1.36	3.78672			2.11743	2.06816
					1.36	1.33328			2.12006	2.06969
					1.36	1.54656			2.12369	2.07338
					1.36	3.09344			2.12369	2.07345
					1.36	3.09344			2.12369	2.07359
					1.38656	7.04			2.12807	2.07631
					1.38656	2.18672			2.13445	2.08026
					1.38672	4.58672			2.13445	2.08122
					1.38672	2.61328			2.13445	2.08293
					1.38672	3.04			2.13471	2.08497
					1.38672	6.16			2.13471	2.08822
					1.38672	0.85328			2.14473	2.09713
					1.38672	0.85328			2.14493	2.09713
					1.38672	0.85328			2.14493	2.09713
					1.38672	0.85328			2.14532	2.09713
					1.38672	0.85328			2.14532	2.09713
					1.38672	1.70656			2.15245	2.09713
					1.4	1.49328			2.15265	2.09719
					1.41328	2.13328			2.15265	2.09721
					1.41328	2.13328			2.15416	2.09721
					1.44	1.28			2.15563	2.09726
					1.44	2.56			2.1628	2.09726
					1.44	1.28			2.17784	2.09726
					1.44	1.6			2.17784	2.09726
					1.44	0.64			2.17809	2.09726
					1.44	2.56			2.17809	2.09726
					1.44	0.64			2.17809	2.09726
					1.44	1.70672			2.17809	2.09733
					1.44	1.70672			2.18067	2.09733
					1.44	0.85344			2.18456	2.09752
					1.44	2.50672			2.18456	2.11223
					1.44	3.30672			2.19486	2.12014
					1.44	1.22672			2.20184	2.12807
					1.44	2.45328			2.20203	2.12812
					1.48	3.46672			2.20203	2.13006
					1.48	2.24			2.20212	2.13116
					1.48	1.01328			2.20212	2.13445
					1.49328	2.02672			2.20212	2.13462
					1.49328	2.02656			2.20212	2.13468
					1.49328	1.01328			2.20227	2.1349
					1.49328	5.12			2.21615	2.14188
					1.49328	1.6			2.22069	2.14473
					1.49328	1.6			2.22089	2.14502
					1.49328	0.8			2.22521	2.14532
					1.49328	0.8			2.22834	2.14532
					1.49344	0.8			2.22834	2.14532
					1.49344	2.98656			2.235	2.14828
					1.49344	3.57344			2.23524	2.15087
					1.49344	1.17328			2.23536	2.16243
					1.49344	1.17328			2.2403	2.16243
					1.52	2.34656			2.24668	2.16263
					1.52	0.58672			2.24668	2.16273
					1.52	1.17344			2.24668	2.16313
					1.52	1.17344			2.24668	2.16313
					1.52	1.17344			2.24702	2.16313
					1.54672	2.13344			2.24706	2.16961
					1.54672	1.92			2.24706	2.17784
					1.54672	0.96			2.24706	2.17809
					1.56	1.33344			2.24716	2.18482
					1.6	1.49328			2.2475	2.20193
					1.6	2.24			2.26099	2.20212
					1.6	1.49344			2.26111	2.2025
					1.6	0.74672			2.27203	2.2025
					1.6	3.68			2.27203	2.21501
					1.6	1.65328			2.28091	2.21615
					1.6	1.28			2.28338	2.2205
					1.6	1.28			2.28792	2.2205
					1.6	1.92			2.28792	2.22063
					1.6	1.28			2.28792	2.22089
					1.6	1.28			2.28819	2.22089
					1.6	2.18672			2.29046	2.2238
					1.6	1.81328			2.29845	2.22827
					1.6	4.53344			2.29892	2.22839
					1.6	1.81344			2.29892	2.22847
					1.6	1.81344			2.29898	2.22847
					1.6	2.34672			2.29898	2.23269
					1.6	1.44			2.30324	2.235
					1.6	2.88			2.30338	2.23518
					1.62672	1.06656			2.30688	2.24668
					1.62672	2.13328			2.3132	2.24685
					1.64	1.06672			2.32796	2.24702
					1.65328	1.06672			2.35895	2.24702
					1.68	1.6			2.35912	2.24706
					1.68	2.13328			2.35912	2.24709
					1.68	0.53328			2.35912	2.24716
					1.68	1.06672			2.35942	2.2475
					1.70656	7.36			2.35942	2.26111
					1.70656	2.45344			2.35942	2.26114
					1.70672	1.22672			2.35942	2.26135
					1.70672	1.92			2.35942	2.26513
					1.76	2.77328			2.35942	2.27199
					1.76	2.08			2.35942	2.27203
					1.76	1.38672			2.35942	2.27212
					1.76	3.09328			2.35957	2.28062
					1.76	4.8			2.35965	2.28338
					1.76	9.06672			2.35965	2.28549
					1.76	1.70672			2.39337	2.2881
					1.76	0.85328			2.40535	2.28819
					1.76	3.73328			2.40549	2.29385
					1.76	1.01328			2.40568	2.29845
					1.8	2.02656			2.40962	2.29871
					1.81328	1.17328			2.41164	2.30688
					1.81328	2.66672			2.41185	2.31327
					1.81328	1.49344			2.41966	2.31795
					1.81344	0.8			2.41992	2.35895
					1.81344	1.28			2.42022	2.35912
					1.81344	0.64			2.42022	2.35912
					1.81344	1.28			2.42489	2.35912
					1.81344	1.12			2.43041	2.35925
					1.84	1.6			2.43117	2.3593
					1.84	1.6			2.43553	2.3593
					1.86656	1.6			2.44672	2.3593
					1.88	0.96			2.44698	2.35942
					1.89328	3.84			2.44698	2.35942
					1.92	1.2			2.45762	2.35942
					1.92	1.2			2.45773	2.35942
					1.92	0.96			2.45778	2.35942
					1.92	0.96			2.47148	2.35942
					1.92	0.96			2.47177	2.35942
					1.92	1.44			2.47177	2.35942
					1.92	1.28			2.47177	2.35957
					1.92	1.28			2.47182	2.35957
					1.92	0.8			2.47182	2.35965
					1.94672	0.8			2.47201	2.35965
					1.96	1.12			2.47201	2.35976
					1.97328	1.70672			2.47201	2.39694
					1.97328	1.70672			2.47853	2.39694
					1.97344	5.70672			2.47868	2.40442
					2	2.77328			2.51671	2.40549
					2	2.77328			2.51671	2.40571
					2.02656	1.22656			2.51671	2.41164
					2.02672	2.45328			2.51681	2.4118
					2.08	0.90672			2.51681	2.43084
					2.08	2.56			2.54091	2.43561
					2.08	1.49328			2.54111	2.44672
					2.16	1.49328			2.54464	2.44672
					2.16	2.66656			2.55604	2.45755
					2.18656	1.92			2.55629	2.46222
					2.18672	1.17328			2.57438	2.47148
					2.18672	1.76			2.58427	2.47177
					2.18672	2.93328			2.62131	2.47187
					2.18672	1.17328			2.62158	2.47201
					2.18672	4.8			2.62158	2.4836
					2.18672	2.02656			2.62158	2.49037
					2.24	0.42672			2.62158	2.51652
					2.24	2.56			2.62158	2.51671
					2.24	2.13328			2.65774	2.51675
					2.34672	2.4			2.66191	2.52804
					2.4	1.97328			2.69629	2.53021
					2.44	2.24			2.69648	2.54081
					2.45328	2.24			2.69648	2.54081
					2.45328	2.24			2.69686	2.54111
					2.45328	1.12			2.69686	2.54111
					2.45328	1.12			2.72654	2.54111
					2.50672	1.38656			2.73809	2.55552
					2.56	1.38672			2.75265	2.55582
					2.56	1.38672			2.75265	2.55582
					2.56	1.38672			2.75265	2.55582
					2.66656	1.38656			2.7713	2.556
					2.66672	1.92			2.77579	2.57403
					2.77328	1.92			2.7826	2.57403
					2.77328	2.18672			2.79617	2.5798
					2.77328	1.49328			2.79635	2.59049
					2.77344	2.24			2.79635	2.59073
					2.77344	1.49328			2.80912	2.59095
					2.88	1.76			2.8313	2.59562
					2.88	4.58672			2.83158	2.60149
					2.88	1.33328			2.8836	2.62147
					2.88	1.33328			2.8836	2.62147
					2.88	1.6			2.884	2.62158
					2.93328	1.6			2.884	2.62158
					2.93344	1.86672			2.92118	2.62165
					2.96	2.13344			2.9316	2.62171
					3.04	1.06672			2.93606	2.62171
					3.09328	2.13344			2.94946	2.62171
					3.09328	1.06672			3.01455	2.62171
					3.09344	2.18656			3.01481	2.68698
					3.2	0.64			3.01494	2.69571
					3.2	0.64			3.0775	2.69571
					3.2	1.28			3.1033	2.69629
					3.36	1.28			3.14555	2.69629
					3.52	0.96			3.14589	2.69648
					3.54672	0.64			3.14589	2.69686
					3.62656	6.08			3.14589	2.71691
					3.68	1.49328			3.14589	2.75221
					3.73328	1.49328			3.14589	2.75221
					3.81328	0.74672			3.26714	2.75251
					3.89344	1.12			3.30319	2.75265
					3.94656	1.49328			3.3706	2.75273
					3.97328	1.49328			3.42318	2.75273
					4	1.49328			3.54001	2.75273
					4.42672	0.74672			3.67047	2.75354
					4.64	2.66672			3.81996	2.80899
					5.49344	0.96			3.86051	2.83074
					5.92	0.72			4.71884	2.8313
						2.13344				2.86017
						1.17344				2.884
						1.28				2.90412
						1.97328				2.90972
						0.69328				2.92013
						1.38656				2.92075
						1.38656				2.92075
						1.38656				2.92075
						1.38672				2.92171
						1.49328				2.93606
						1.49344				2.93637
						2.13328				3.14565
						2.13328				3.14565
						1.28				3.14589
						2.77328				3.14607
						2.34672				3.14611
						1.06672				3.14636
						1.6				3.37036
						1.17328				3.45963
						1.92				3.53935
						0.90672				4.45694
