# Supplementary material for: Comparative analysis of two Caenorhabditis elegans kinesins KLP-6 and UNC-104 reveals a common and distinct activation mechanism in kinesin-3
Source: eLife. 2024 Jan 11;12:RP89040. doi: 10.7554/eLife.89040 (PMC10945585; doi:10.7554/eLife.89040)
Supplement: Figure 7—source data 1. — The result of single molecule assays using UNC-104(1–594) and UNC-104(1–594)(E412K). Landing rate, run length, and velocity are shown. Dot plots are shown in Figure 7E, F, and G, respectively. [file elife-89040-fig7-data1.xlsx]

## Sheet: Fig.7
	Landing rate (/μm/sec)				Run length (μm)				Velocity (μm/sec)
	UNC-104(1-594)	UNC-104(1-594)(E412K)			UNC-104(1-594)	UNC-104(1-594)(E412K)			UNC-104(1-594)	UNC-104(1-594)(E412K)
n	31	32		n	467	609		n	467	609
Median	0.00365461	0.00891205		Median	1.17344	1.17328		Average	2.0272	1.94996
								SD	0.546105	0.501926
Data	0.00631038	0.00727287		Data	0.64	0.64		Data	0.629178	0.589836
	0.00273081	0.0051533			0.64	0.56			0.858009	0.611701
	0.00390679	0.00936277			1.38672	0.85328			0.973766	0.699043
	0.00359862	0.0066942			0.64	1.28			1.04863	0.786473
	0.0037172	0.00433717			0.64	2.02672			1.04863	0.807739
	0.00418104	0.00760993			1.44	0.48			1.08896	0.943767
	0.0037014	0.00585173			1.12	0.32			1.13899	0.943862
	0.00330636	0.00841338			0.72	1.17328			1.17971	0.961201
	0.00200358	0.00989534			1.04	1.68			1.20284	0.971525
	0.00243607	0.00451499			0.56	0.74672			1.2234	1.00108
	0.00397394	0.0124014			0.88	0.72			1.23589	1.01118
	0.00529176	0.00778466			0.64	0.48			1.25836	1.04863
	0.00447402	0.0100609			0.42672	0.64			1.25864	1.04863
	0.00515207	0.0128773			1.36	1.28			1.27334	1.04863
	0.00365461	0.0114847			0.8	1.36			1.31079	1.0696
	0.0026146	0.011599			1.06672	0.56			1.31085	1.10106
	0.00364108	0.0110694			2.56	0.4			1.32459	1.12353
	0.00357055	0.00954457			0.88	2.34656			1.33095	1.15344
	0.00517198	0.00909448			0.64	0.72			1.34814	1.17971
	0.00245773	0.0131864			0.96	1.44			1.34824	1.17971
	0.00442037	0.00797354			1.04	2.24			1.36322	1.17975
	0.00444168	0.00748004			0.72	0.64			1.3699	1.17978
	0.0016517	0.00808836			0.74656	0.64			1.37622	1.17978
	0.00337188	0.0066736			0.74672	0.64			1.37625	1.17978
	0.00115062	0.00872963			2.8	1.84			1.37633	1.20592
	0.0042224	0.0132391			0.56	0.8			1.37633	1.20996
	0.0019374	0.00991019			1.49328	0.90656			1.37636	1.21537
	0.00368019	0.0075941			0.74672	0.74656			1.37651	1.22323
	0.00189472	0.0127613			1.2	1.49328			1.38789	1.22336
	0.00396408	0.0101635			2.45344	0.56			1.39154	1.2234
	0.00208282	0.00686942			0.64	0.56			1.39817	1.2234
		0.0094238			0.85344	0.56			1.39835	1.2234
					3.44	1.49344			1.39936	1.22349
					0.72	0.74672			1.41565	1.22349
					0.72	1.17328			1.41565	1.23574
					0.72	1.6			1.41565	1.24186
					1.44	1.52			1.41565	1.24525
					1.92	0.64			1.41569	1.25836
					2	0.32			1.42137	1.25836
					2.64	0.64			1.42861	1.25836
					0.8	2.32			1.42995	1.26709
					0.8	2			1.42995	1.2685
					1.17328	4.48			1.4418	1.27659
					1.17344	1.44			1.442	1.28696
					0.96	0.72			1.45195	1.28696
					2.88	0.53328			1.45195	1.31066
					2.05328	1.06656			1.45924	1.31066
					0.69328	2.4			1.46038	1.31079
					1.04	2.4			1.46059	1.31079
					2.24	2.56			1.46808	1.32459
					1.49344	0.58672			1.46819	1.33118
					1.6	0.64			1.47473	1.34814
					0.82672	0.64			1.47771	1.34814
					1.28	0.48			1.48042	1.34824
					1.28	1.44			1.48042	1.34824
					1.28	0.96			1.48042	1.34824
					1.52	0.64			1.4943	1.34843
					3.62656	1.30672			1.52792	1.35224
					1.17328	1.38656			1.57273	1.36311
					1.49328	2.64			1.57278	1.36598
					0.74672	2.64			1.57295	1.36598
					1.38672	1.09328			1.57295	1.37214
					2.34672	0.56			1.57295	1.37633
					1.76	0.56			1.57295	1.37633
					0.88	0.74672			1.57295	1.37651
					0.88	0.74672			1.57295	1.37651
					1.44	0.8			1.57295	1.38781
					0.64	0.85328			1.57295	1.39809
					1.84	0.85328			1.57295	1.39809
					0.8	0.85328			1.57295	1.39809
					0.96	0.64			1.57295	1.39817
					0.64	0.48			1.57295	1.41537
					0.64	0.96			1.57295	1.41558
					0.64	0.96			1.57295	1.41558
					0.8	0.96			1.57295	1.41558
					0.96	0.72			1.57295	1.41565
					0.96	0.72			1.57295	1.41565
					0.4	0.72			1.57295	1.41565
					1.6	1.44			1.57295	1.41565
					1.28	1.06672			1.57295	1.43009
					0.96	1.06672			1.57295	1.43009
					0.96	1.06672			1.57295	1.43009
					0.96	1.09328			1.57295	1.43306
					1.94672	0.88			1.57295	1.44187
					1.28	1.76			1.57295	1.44187
					3.2	1.28			1.57295	1.45189
					0.64	0.48			1.57295	1.45195
					0.64	1.04			1.57295	1.46059
					1.6	2.88			1.57295	1.46449
					0.96	1.12			1.57295	1.46808
					0.8	1.49344			1.57295	1.46819
					0.8	1.49344			1.57295	1.46819
					0.8	1.49344			1.57295	1.46819
					0.56	1.28			1.57295	1.48042
					0.56	1.28			1.57295	1.48042
					1.12	0.85328			1.57295	1.4805
					2.24	4.24			1.57295	1.48868
					1.04	1.92			1.57295	1.49012
					0.69328	1.44			1.57295	1.49016
					1.06672	2.96			1.57318	1.49228
					0.53344	1.09328			1.57342	1.49964
					3.38672	2.77328			1.59816	1.51466
					2.77344	3.73328			1.63599	1.52923
					1.22656	0.74656			1.64415	1.57261
					1.2	0.74656			1.64603	1.57261
					1.76	0.85328			1.64785	1.57265
					2.13328	1.06656			1.65565	1.57271
					1.6	1.17328			1.65573	1.57273
					1.6	2.02656			1.65573	1.57282
					1.6	1.06672			1.65573	1.57295
					2.13344	1.44			1.65577	1.57295
					1.52	0.72			1.66033	1.57295
					0.96	0.53328			1.66537	1.57295
					1.44	1.44			1.66547	1.57295
					1.36	0.88			1.67125	1.57295
					1.2	0.88			1.6853	1.57295
					2.4	2.88			1.6853	1.57295
					1.2	0.72			1.6853	1.57295
					1.2	0.88			1.6853	1.57295
					1.49328	0.72			1.69382	1.57295
					1.49344	1.28			1.694	1.57295
					2.16	1.68			1.69878	1.57295
					1.38656	1.52			1.70389	1.57295
					1.04	0.96			1.70402	1.57295
					1.04	1.28			1.70402	1.57295
					1.04	0.64			1.70402	1.57295
					1.28	0.96			1.71578	1.57295
					1.92	0.96			1.71594	1.57295
					0.96	0.96			1.71594	1.57295
					0.96	0.64			1.71594	1.57295
					0.96	0.8			1.71594	1.57295
					1.84	0.48			1.72275	1.57295
					1.22672	1.36			1.72282	1.57295
					1.17328	2.16			1.73007	1.57295
					0.88	0.96			1.73024	1.57295
					0.88	0.8			1.73024	1.57295
					1.17344	0.96			1.73031	1.57295
					1.17344	0.96			1.73031	1.57295
					1.17344	1.36			1.73031	1.57295
					1.17328	0.8			1.73033	1.57295
					1.17328	2			1.73033	1.57295
					1.17328	0.64			1.73033	1.57295
					0.58672	1.41328			1.73057	1.57295
					1.68	1.28			1.73852	1.57295
					1.12	0.96			1.73861	1.57295
					1.09328	1.06672			1.74281	1.57295
					1.06656	5.28			1.74754	1.57295
					1.06656	0.56			1.74754	1.57295
					0.8	1.06672			1.74772	1.57295
					0.8	1.04			1.74772	1.57295
					1.6	1.12			1.74772	1.57295
					1.06672	1.04			1.7478	1.57295
					1.06672	1.12			1.7478	1.57295
					1.54672	2.24			1.75443	1.57295
					1.52	0.74672			1.758	1.57295
					2.02672	1.17344			1.7581	1.57316
					2.24	1.06672			1.7617	1.57318
					1.49328	0.85344			1.76171	1.57324
					0.98672	0.42672			1.7637	1.57354
					0.96	4.69328			1.76934	1.60954
					1.92	1.86672			1.76951	1.6193
					1.44	3.30672			1.76956	1.6254
					0.72	3.30672			1.76956	1.6254
					1.44	2.66672			1.76956	1.63852
					0.72	1.6			1.76956	1.65573
					0.96	1.06672			1.76967	1.6559
					1.92	1.52			1.76967	1.66033
					3.62656	2.61328			1.78262	1.67553
					1.36	0.85328			1.78267	1.6777
					1.36	1.28			1.78267	1.67781
					0.90672	4.90672			1.78278	1.68268
					0.85328	3.68			1.79741	1.68269
					0.85328	1.6			1.79741	1.68536
					1.28	1.6			1.79765	1.68536
					0.64	0.74656			1.79765	1.69383
					0.64	2.24			1.79765	1.69394
					0.64	1.38656			1.79765	1.70389
					1.28	2.08			1.79765	1.70402
					1.28	1.04			1.79765	1.70402
					0.64	1.04			1.79765	1.70402
					1.28	2			1.79765	1.70972
					0.85344	1.33328			1.79775	1.7098
					1.70672	2.56			1.79777	1.7159
					1.70672	2.56			1.79777	1.7159
					0.85328	0.96			1.7978	1.71594
					0.85328	2.88			1.7978	1.71594
					1.6	1.28			1.81487	1.71602
					1.6	1.28			1.81487	1.71602
					1.6	1.28			1.81487	1.71602
					1.2	2.45328			1.81494	1.72271
					1.2	1.81328			1.81494	1.72517
					1.2	1.17328			1.81494	1.73007
					3.2	1.76			1.81497	1.73024
					2.32	0.88			1.82462	1.73024
					0.74656	0.88			1.83484	1.73024
					1.49328	0.88			1.83504	1.73024
					1.49328	1.17328			1.83504	1.73033
					2.8	0.58672			1.8351	1.73057
					1.12	3.30672			1.8351	1.74147
					0.56	1.09328			1.8351	1.74281
					0.56	2.16			1.8351	1.74528
					0.56	1.06656			1.8351	1.74754
					1.12	1.06656			1.8351	1.74754
					1.12	1.06656			1.8351	1.74754
					1.12	1.6			1.8351	1.74772
					1.12	0.8			1.8351	1.74772
					2.24	0.8			1.8351	1.74772
					1.12	3.2			1.8351	1.74772
					0.56	1.06672			1.8351	1.7478
					1.12	1.06672			1.8351	1.7478
					0.56	1.06672			1.8351	1.7478
					1.12	1.06672			1.8351	1.7478
					1.12	0.53344			1.8351	1.74807
					1.12	2.02656			1.8351	1.7578
					0.74672	1.52			1.83523	1.758
					1.44	2.02672			1.84642	1.7581
					2.16	0.96			1.8465	1.76934
					2.16	0.72			1.8465	1.76956
					1.6	1.44			1.85052	1.76956
					1.41328	0.72			1.85251	1.76956
					1.38672	0.96			1.85884	1.76967
					1.38656	0.96			1.85888	1.76967
					1.04	0.96			1.85894	1.76967
					1.04	1.92			1.85894	1.76967
					2.02672	0.96			1.86786	1.76967
					1.52	1.81344			1.86787	1.78278
					1.52	2			1.86787	1.78744
					3.52	2			1.87053	1.78744
					0.96	2.66672			1.88753	1.78755
					0.48	6.64			1.88753	1.78842
					0.96	5.28			1.88753	1.7899
					0.96	0.85328			1.88753	1.79741
					0.96	0.85328			1.88753	1.79741
					0.96	2.56			1.88753	1.79765
					1.44	0.64			1.88753	1.79765
					1.44	3.84			1.88753	1.79765
					2.45344	1.28			1.90412	1.79765
					1.81328	0.64			1.90981	1.79765
					1.17328	0.64			1.9224	1.79765
					1.17328	0.64			1.9224	1.79765
					0.88	0.64			1.92249	1.79765
					1.76	0.64			1.92249	1.79765
					0.88	0.85344			1.92249	1.79775
					0.88	0.85344			1.92249	1.79775
					1.17344	0.85328			1.92266	1.7978
					1.70672	0.85344			1.93592	1.79813
					1.70672	0.85344			1.93592	1.79813
					1.28	1.84			1.93593	1.80889
					2.56	2.45344			1.93593	1.80901
					1.28	0.8			1.93593	1.81466
					1.28	1.2			1.93593	1.81494
					0.82672	3.2			1.95042	1.81497
					0.53328	0.8			1.96574	1.81508
					1.06656	1.16			1.96611	1.82462
					1.06656	0.74656			1.96611	1.83484
					1.6	0.74656			1.96618	1.83484
					0.8	0.74656			1.96618	1.83484
					1.6	0.74656			1.96618	1.83484
					0.8	0.74656			1.96618	1.83484
					1.6	1.68			1.96618	1.8351
					0.8	2.8			1.96618	1.8351
					0.8	1.12			1.96618	1.8351
					0.8	1.12			1.96618	1.8351
					0.8	0.56			1.96618	1.8351
					0.8	0.56			1.96618	1.8351
					1.06672	0.56			1.9664	1.8351
					1.06672	2.98672			1.9664	1.83514
					1.52	1.49344			1.9924	1.83523
					1.52	0.74672			1.9924	1.83523
					1.12	1.49344			2.00193	1.83523
					1.12	0.74672			2.00193	1.83523
					1.12	3.28			2.00193	1.84259
					1.49328	2.88			2.00195	1.84654
					1.49328	1.6			2.00195	1.85052
					1.22672	2.13328			2.00996	1.85053
					0.96	4.26672			2.02221	1.8506
					0.96	1.38656			2.02221	1.85888
					0.96	0.69344			2.02221	1.85905
					0.72	1.38672			2.02236	1.85909
					1.44	1.38672			2.02236	1.85909
					0.72	1.28			2.02236	1.86423
					0.72	1.52			2.02236	1.86787
					2.16	4.69344			2.02236	1.87062
					4.24	2.66656			2.03332	1.87248
					1.76	1.33344			2.03558	1.8727
					1.38656	2.48			2.04457	1.87543
					1.04	1.30672			2.04483	1.88003
					1.04	0.96			2.04483	1.88753
					1.04	0.96			2.04483	1.88753
					1.04	1.92			2.04483	1.88753
					1.38656	0.96			2.04488	1.88753
					1.36	0.96			2.05693	1.88753
					1.36	0.96			2.05693	1.88753
					2.72	0.96			2.05693	1.88753
					1.81344	0.96			2.05697	1.88753
					3.38672	0.96			2.05941	1.88753
					2	0.96			2.06966	1.88753
					2.64	1.92			2.07629	1.88753
					1.94672	1.44			2.08771	1.88753
					0.64	0.64			2.09726	1.88772
					0.64	0.64			2.09726	1.88772
					1.28	1.28			2.09726	1.88772
					1.28	1.28			2.09726	1.88772
					2.24	0.64			2.09726	1.88772
					2.45328	0.64			2.12812	1.88772
					1.52	0.64			2.13471	1.88772
					1.01344	5.65344			2.13478	1.89468
					2.02672	1.25328			2.13484	1.89552
					0.8	2.8			2.14473	1.89838
					1.2	3.68			2.14493	1.90409
					1.2	1.84			2.14493	1.90409
					0.88	3.2			2.1628	1.9066
					1.17328	4.26672			2.16284	1.90662
					1.17344	0.90656			2.16313	1.90964
					1.44	1.81328			2.17792	1.90981
					1.44	1.81328			2.17792	1.90981
					3.57328	1.81328			2.19554	1.91002
					0.74672	0.90672			2.20184	1.91039
					0.74672	5.76			2.20184	1.91953
					1.49328	1.17328			2.20193	1.9224
					1.12	1.17328			2.20212	1.9224
					1.68	1.17328			2.20212	1.9224
					2.24	1.17328			2.20212	1.9224
					0.56	0.88			2.20212	1.92249
					1.12	1.76			2.20212	1.92249
					0.56	0.88			2.20212	1.92249
					1.12	0.88			2.20212	1.92249
					1.49344	1.17344			2.20217	1.92266
					2.72	2.02656			2.22834	1.92809
					2.88	5.2			2.23536	1.92908
					1.97344	1.70656			2.23846	1.93574
					1.06656	1.28			2.24668	1.93593
					2.13328	1.28			2.24685	1.93593
					1.06656	2.77344			2.24716	1.94753
					1.06672	1.06656			2.2475	1.96611
					1.06672	1.6			2.2475	1.96618
					2.45328	1.6			2.26099	1.96618
					1.84	0.8			2.26111	1.96618
					4.69328	0.8			2.26907	1.96618
					1.04	0.8			2.27203	1.96618
					1.04	1.6			2.27203	1.96618
					1.04	1.2			2.27203	1.96618
					1.04	0.8			2.27203	1.96618
					1.04	0.8			2.27203	1.96618
					1.04	1.6			2.27203	1.96618
					1.38672	1.6			2.27212	1.96618
					2.32	2.13344			2.28077	1.96622
					1.28	1.54672			2.28792	1.98326
					1.28	14.16			2.28792	1.98392
					1.36	2.8			2.29214	1.98992
					1.52	2.53328			2.29892	1.99236
					2.72	4.05328			2.32522	1.99237
					0.64	1.52			2.35912	1.9924
					1.28	1.52			2.35912	1.9924
					1.68	1.52			2.35942	1.9924
					1.2	2.02672			2.35942	1.99245
					1.2	2.64			2.35942	1.99643
					0.96	0.74672			2.35942	2.00189
					0.96	0.74672			2.35942	2.00189
					0.96	1.49328			2.35942	2.00195
					2.4	1.22656			2.35942	2.0097
					0.96	2.45328			2.35942	2.00983
					0.96	0.48			2.35942	2.02178
					0.96	0.96			2.35942	2.02221
					3.84	0.96			2.35942	2.02221
					0.96	0.96			2.35942	2.02221
					1.44	0.96			2.35942	2.02221
					1.44	0.96			2.35942	2.02221
					1.44	0.72			2.35942	2.02236
					3.04	1.44			2.39088	2.02236
					2.56	0.96			2.39687	2.02265
					4.88	2.48			2.39874	2.03172
					2.45328	2.48			2.4118	2.03172
					3.2	1.76			2.41992	2.03558
					0.90672	1.76			2.43084	2.03558
					1.36	1.38656			2.43092	2.04457
					1.49328	1.38656			2.44672	2.04457
					2.24	1.04			2.4468	2.04483
					0.88	1.04			2.47177	2.04483
					0.88	1.04			2.47177	2.04483
					0.88	2.77344			2.47177	2.04496
					0.88	1.81328			2.47177	2.05679
					0.88	0.90656			2.47177	2.05684
					2.34672	1.36			2.47192	2.05693
					1.52	1.36			2.4905	2.05693
					0.85328	1			2.51605	2.06966
					3.41328	3.09328			2.51655	2.07335
					0.64	1.76			2.51671	2.07637
					0.64	4.56			2.51671	2.08507
					0.64	5.84			2.51671	2.08773
					1.28	1.06656			2.51671	2.09705
					0.85328	0.85328			2.51681	2.09713
					0.85328	0.85328			2.51681	2.09713
					1.70656	0.85328			2.51681	2.09713
					1.68	0.85328			2.54091	2.09713
					1.38656	0.85328			2.55552	2.09713
					1.38672	0.85328			2.55582	2.09713
					1.04	0.85328			2.55604	2.09713
					1.04	2.98656			2.55604	2.09719
					1.04	1.92			2.55604	2.09726
					8.24	1.92			2.57164	2.09726
					1.44	0.96			2.57391	2.09726
					0.93328	0.96			2.62143	2.09726
					2	1.28			2.62158	2.09726
					1.2	1.28			2.62158	2.09726
					0.8	0.64			2.62158	2.09726
					1.6	0.64			2.62158	2.09726
					1.06672	0.64			2.62171	2.09726
					1.06672	0.64			2.62171	2.09726
					1.36	4.69344			2.67401	2.09731
					3.62672	1.70672			2.67411	2.09733
					1.28	1.70672			2.69629	2.09733
					0.96	1.70672			2.69648	2.09733
					0.96	1.06672			2.69648	2.09737
					0.96	0.85344			2.69648	2.09752
					1.28	0.85344			2.69686	2.09752
					1.28	0.42672			2.69686	2.09752
					1.52	0.85344			2.71691	2.09752
					2.08	4.4			2.72644	2.11005
					0.74656	1.04			2.75192	2.11549
					1.49328	1.04			2.75221	2.11549
					1.12	2.88			2.75265	2.12337
					1.12	3.04			2.75265	2.13471
					1.49328	1.52			2.75273	2.13471
					1.36	0.76			2.76641	2.13471
					1.28	2.02672			2.79635	2.13484
					1.28	2.4			2.79635	2.14493
					1.70672	1.2			2.79643	2.14493
					1.92	2.4			2.83116	2.14493
					1.92	0.8			2.83116	2.14532
					1.92	2.77328			2.83116	2.15235
					0.96	5.92			2.83158	2.15552
					1.17328	0.88			2.8836	2.1628
					1.17328	0.88			2.8836	2.1628
					1.17328	0.88			2.8836	2.1628
					1.92	0.88			2.9039	2.1628
					1.04	0.88			2.92118	2.1628
					1.38672	0.44			2.92171	2.1628
					1.6	0.88			2.9489	2.1628
					1.2	1.17328			2.94927	2.16284
					1.6	1.17344			2.94946	2.16313
					2.72	0.58672			2.97112	2.16354
					1.06656	2.32			3.14495	2.17216
					1.06672	6.93328			3.14542	2.17536
					1.06672	1.92			3.14542	2.17784
					1.49328	1.92			3.14555	2.17784
					1.49344	1.92			3.14589	2.17784
					1.28	1.92			3.14589	2.17809
					1.28	1.14672			3.14589	2.18179
					0.8	0.74656			3.14589	2.20137
					1.92	0.74656			3.14589	2.20203
					1.28	0.74656			3.14589	2.20203
					0.96	0.56			3.14589	2.20212
					0.64	1.68			3.14589	2.20212
					1.49344	1.12			3.14589	2.20212
					1.12	1.12			3.14589	2.20212
					1.81328	1.12			3.34262	2.20212
					1.2	0.56			3.3706	2.20212
					1.38656	1.49344			3.40779	2.20217
					0.88	3.30656			3.46048	2.2163
					1.17328	1.28			3.46067	2.2205
					0.96	2.56			3.54001	2.22069
					1.12	2.72			3.67021	2.22834
					1.52	4.56			3.73575	2.24145
					1.76	1.06656			3.84498	2.24668
					1.6	2.13328			4.49413	2.24685
					0.88	1.06672			5.76747	2.24702
						0.8				2.24706
						0.8				2.24706
						0.8				2.24706
						3.2				2.24706
						1.38656				2.27186
						1.04				2.27203
						2.08				2.27203
						2.08				2.27203
						1.38672				2.27212
						1.38672				2.27212
						1.38672				2.27212
						1.28				2.28792
						1.28				2.28792
						1.28				2.28792
						3.04				2.29892
						1.01328				2.29898
						2				2.31315
						1.28				2.35912
						0.64				2.35912
						0.96				2.35942
						0.96				2.35942
						0.96				2.35942
						0.96				2.35942
						0.96				2.35942
						1.68				2.35942
						1.32				2.35942
						0.96				2.35942
						0.96				2.35942
						0.96				2.35942
						1.92				2.35942
						0.96				2.35942
						0.72				2.35942
						0.72				2.35942
						2.88				2.35942
						8				2.35944
						1.28				2.35957
						1.28				2.35957
						1.28				2.35957
						1.6				2.35965
						1.6				2.35965
						0.64				2.36001
						3.76				2.38479
						1.09328				2.38843
						4.64				2.40081
						1.16				2.40081
						2.45344				2.41195
						3.2				2.41992
						1.06672				2.42022
						0.90672				2.43084
						2.48				2.43807
						2.98656				2.44672
						1.49344				2.44698
						0.88				2.47177
						0.88				2.47177
						1.17344				2.47182
						0.58672				2.47235
						1.01328				2.49037
						1.52				2.4905
						2.02672				2.49056
						2.02672				2.49056
						0.85328				2.51605
						1.28				2.51671
						1.28				2.51671
						0.64				2.51671
						2.56				2.51671
						0.85328				2.51681
						0.85328				2.51681
						0.85328				2.51681
						0.85328				2.51681
						2.4				2.52804
						1.16				2.53419
						1.12				2.54052
						1.38656				2.55552
						1.38656				2.556
						1.38656				2.556
						2.08				2.55604
						1.04				2.55604
						1.38672				2.55629
						1.92				2.57368
						0.96				2.57368
						1.44				2.57391
						1.44				2.57391
						2.24				2.59073
						0.53328				2.62131
						1.2				2.62158
						4				2.62158
						1.2				2.62158
						1				2.62158
						1.8				2.62158
						1.2				2.62158
						1.2				2.62158
						0.8				2.62158
						0.8				2.62158
						1.06672				2.62171
						1.06672				2.62171
						1.81328				2.67379
						0.90656				2.67396
						1.81344				2.67403
						1.81344				2.67403
						1.28				2.69629
						1.28				2.69629
						0.96				2.69648
						0.96				2.69648
						0.74672				2.75251
						1.68				2.75265
						1.12				2.75265
						0.56				2.75265
						2.24				2.75265
						1.97328				2.7713
						1.84				2.7829
						1.70672				2.79643
						2				2.80883
						0.96				2.83074
						1.92				2.83116
						0.72				2.8313
						1.06656				2.85935
						1.6				2.8599
						1.17328				2.8836
						0.88				2.88373
						0.88				2.88373
						0.88				2.88373
						0.88				2.88373
						2.34672				2.8838
						1.38656				2.92138
						0.8				2.9489
						2.4				2.94927
						5.28				2.96613
						1.36				2.97112
						2.16				3.03354
						1.65328				3.04767
						2.13328				3.14565
						0.8				3.14589
						1.12				3.14589
						1.12				3.14589
						3.30672				3.25081
						7.12				3.25563
						2.34672				3.4609
						1.44				3.53913
						0.96				3.54001
						2.66672				3.57511
						2.08				4.08966
						2.24				5.50531
