# Supplementary figures and images for: Comparative analysis of two Caenorhabditis elegans kinesins KLP-6 and UNC-104 reveals a common and distinct activation mechanism in kinesin-3
Source: eLife journal article supplement (doi:10.7554/elife.89040), 2023-07-18

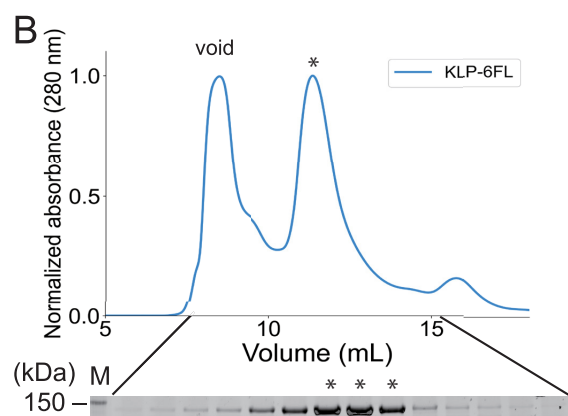

KLP-6FL

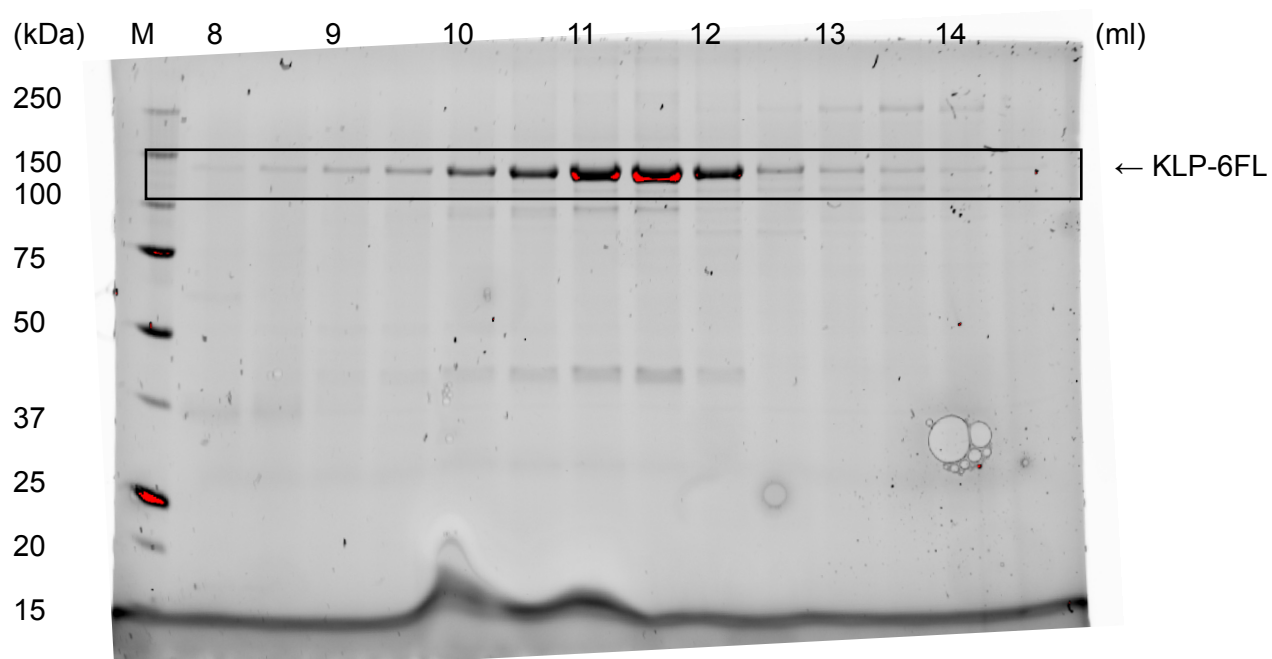

Supplement: fig1-data2 [file Figure 1—source data 2.pdf › Figure 1—source data 2/Figure 1—source data 2.pdf]

**B**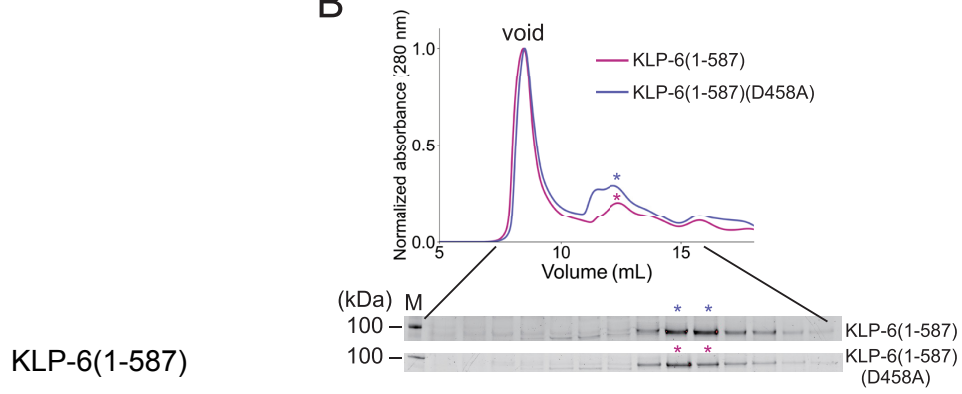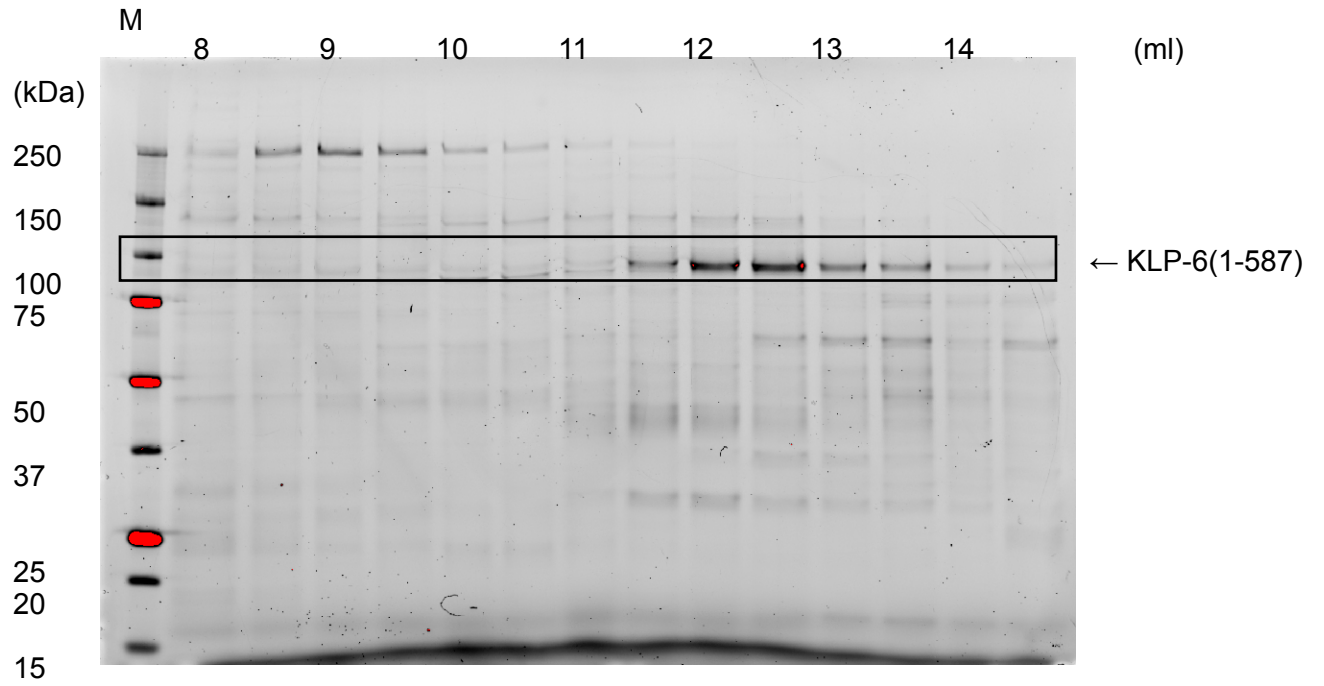**KLP-6(1-587)(D458A)**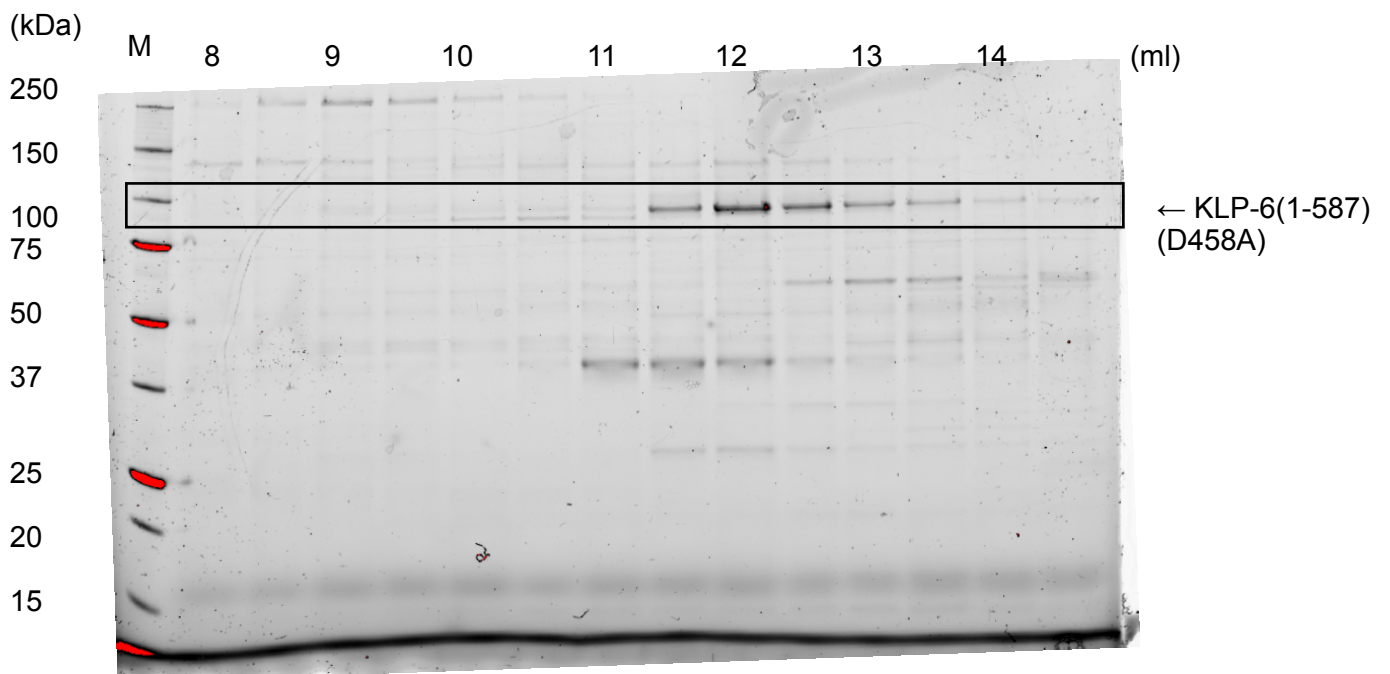

Supplement: fig4-data3 [file elife-89040-fig4-data3-v1.zip]

**B**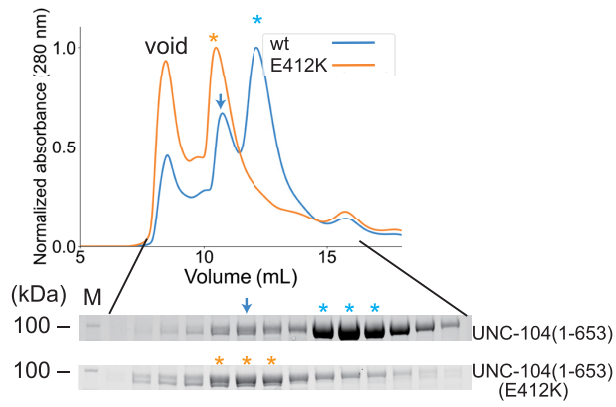

UNC-104(1-653)

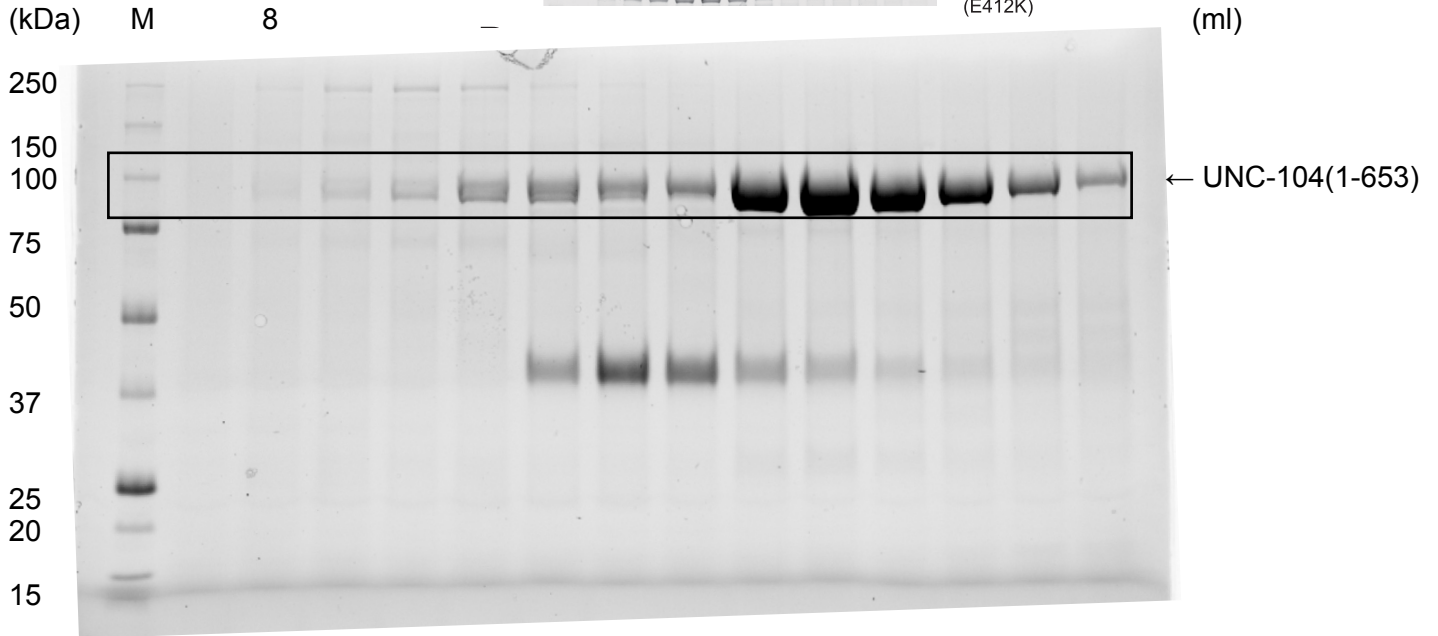

UNC-104(1-653)(E412K)

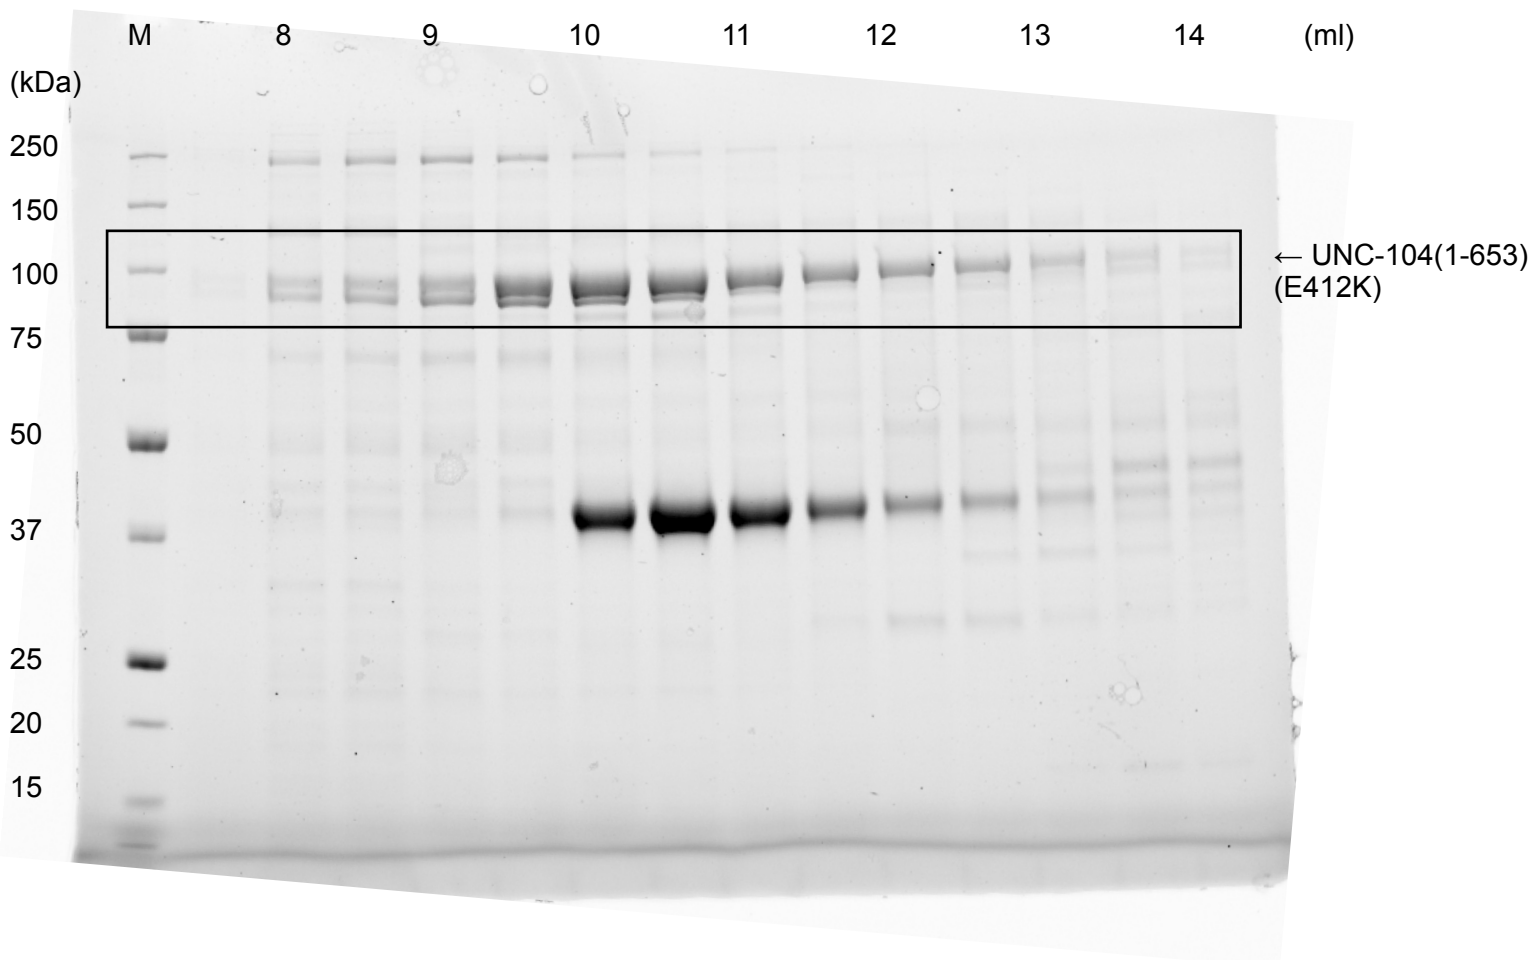

Supplement: fig5-data3 [file elife-89040-fig5-data3-v1.zip]

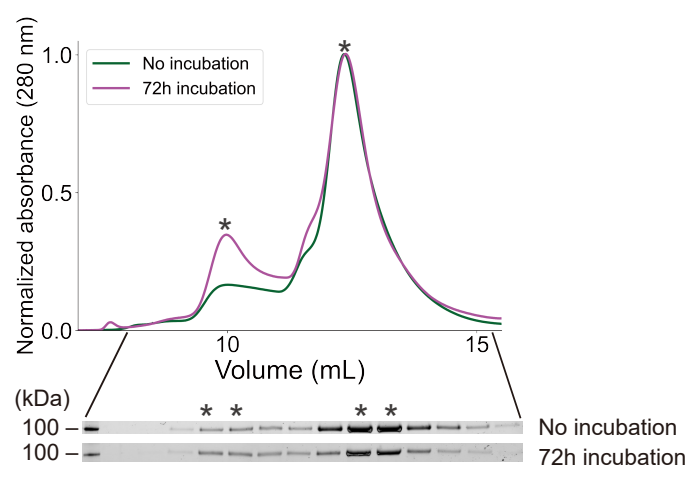

No incubation

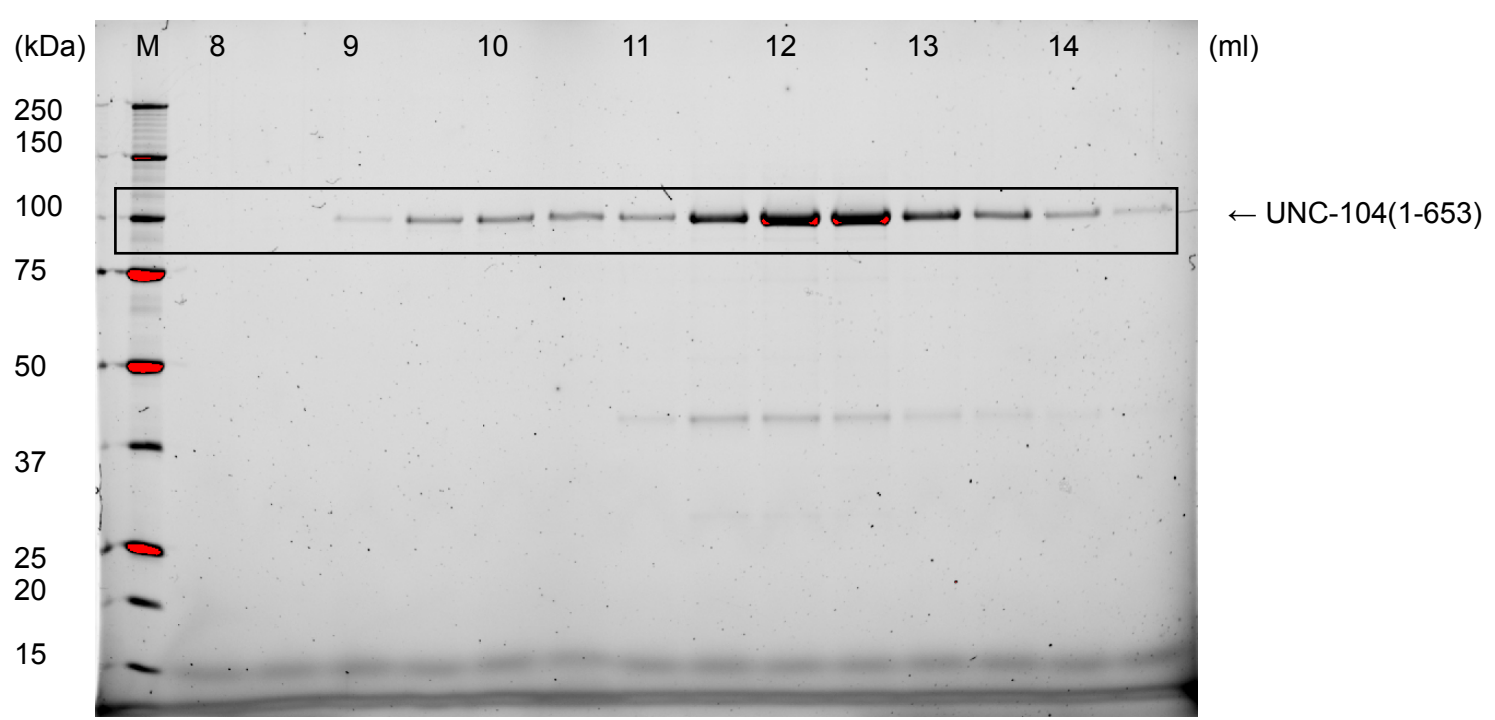

72h incubation

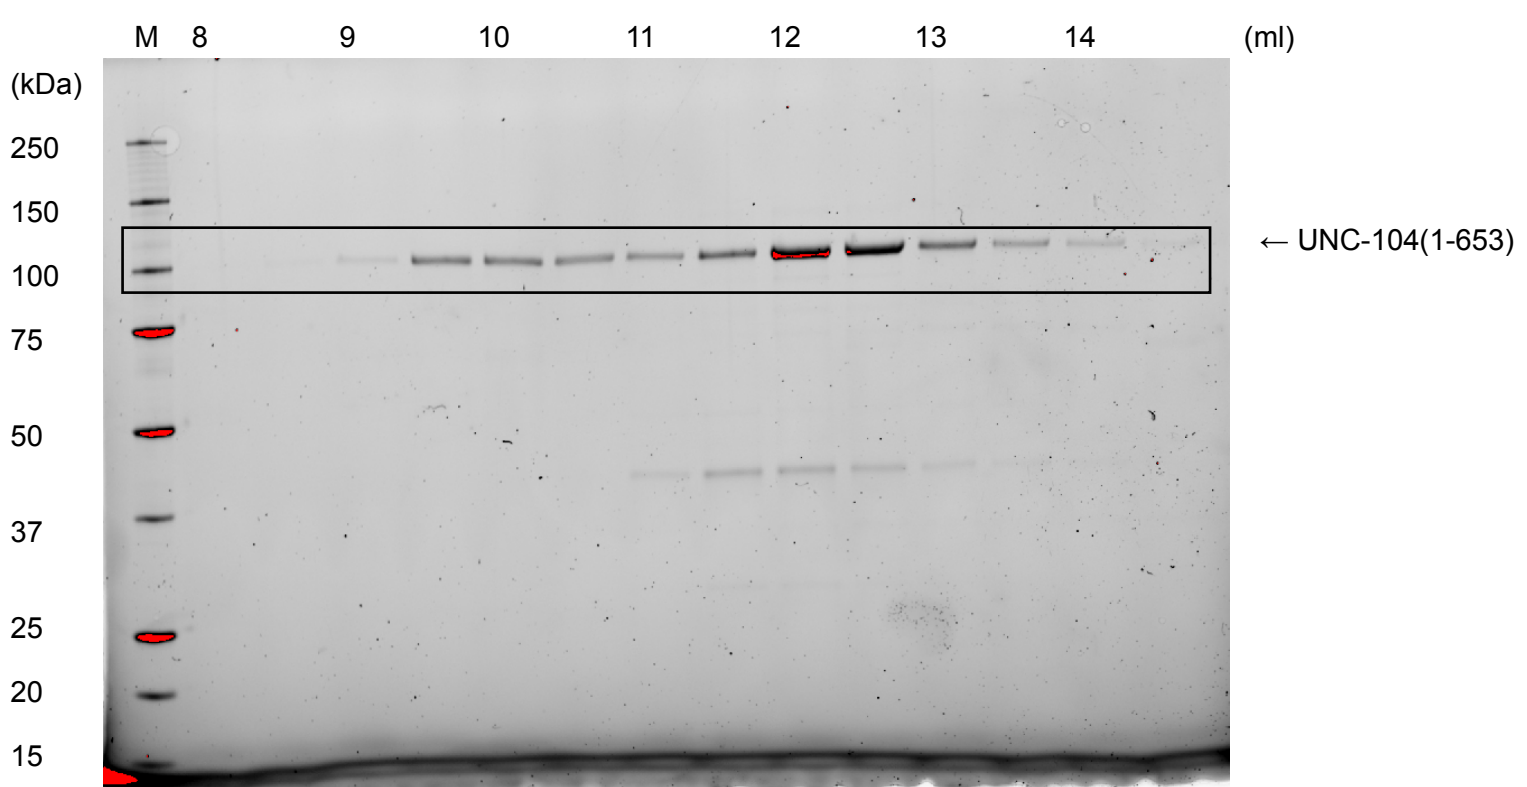

Supplement: fig5-figsupp1-data2 [file elife-89040-fig5-figsupp1-data2-v1.zip]

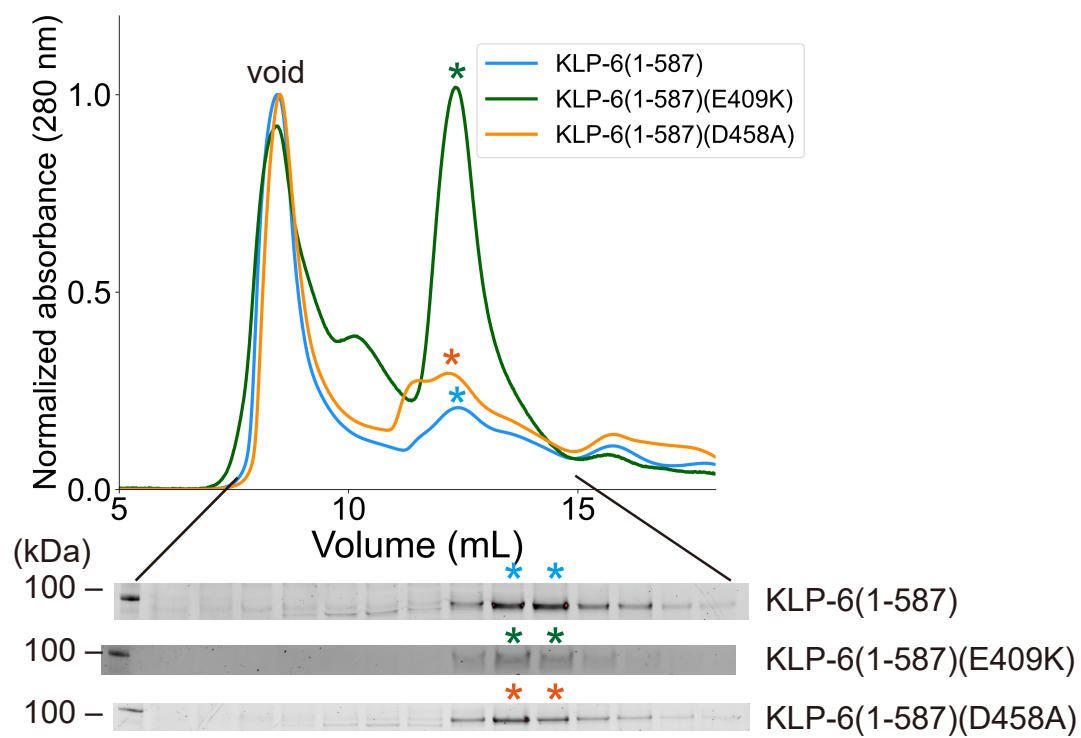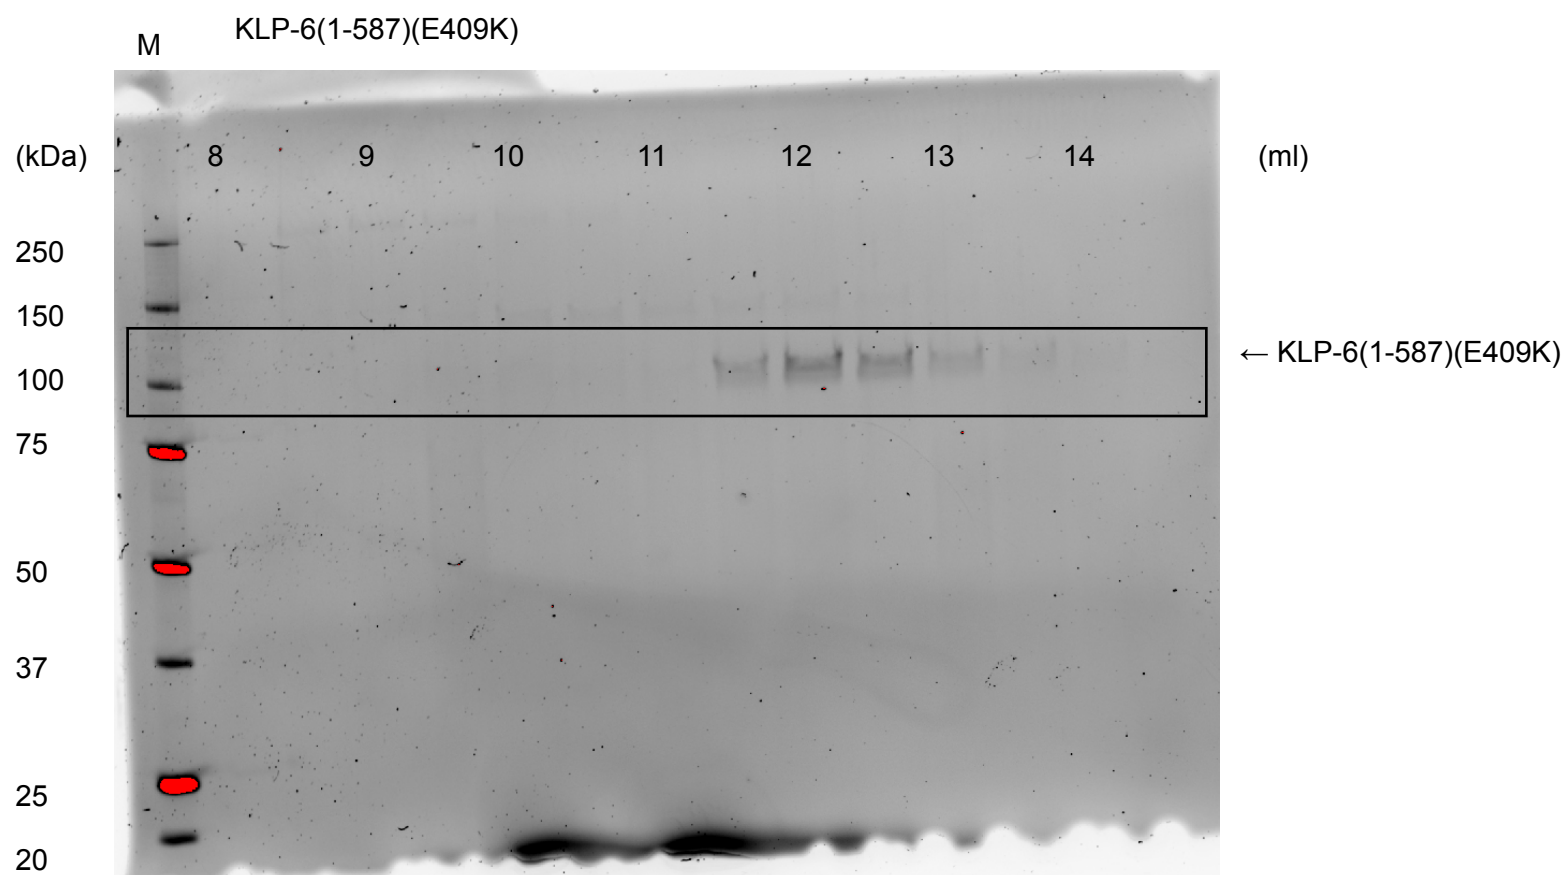

Supplement: fig5-figsupp3-data2 [file Figure 5-figure supplement3—source data 2.pdf › Figure 5-figure supplement3—source data 2/Figure 5-figure supplement3—source data 2.pdf]

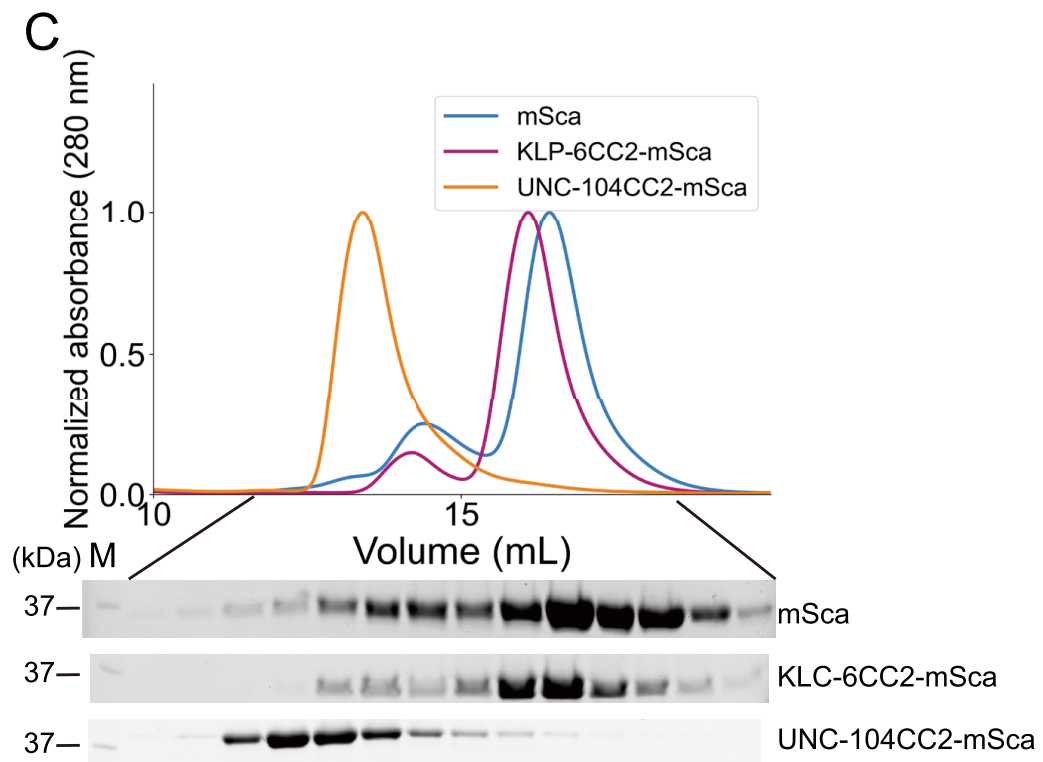

# mSca

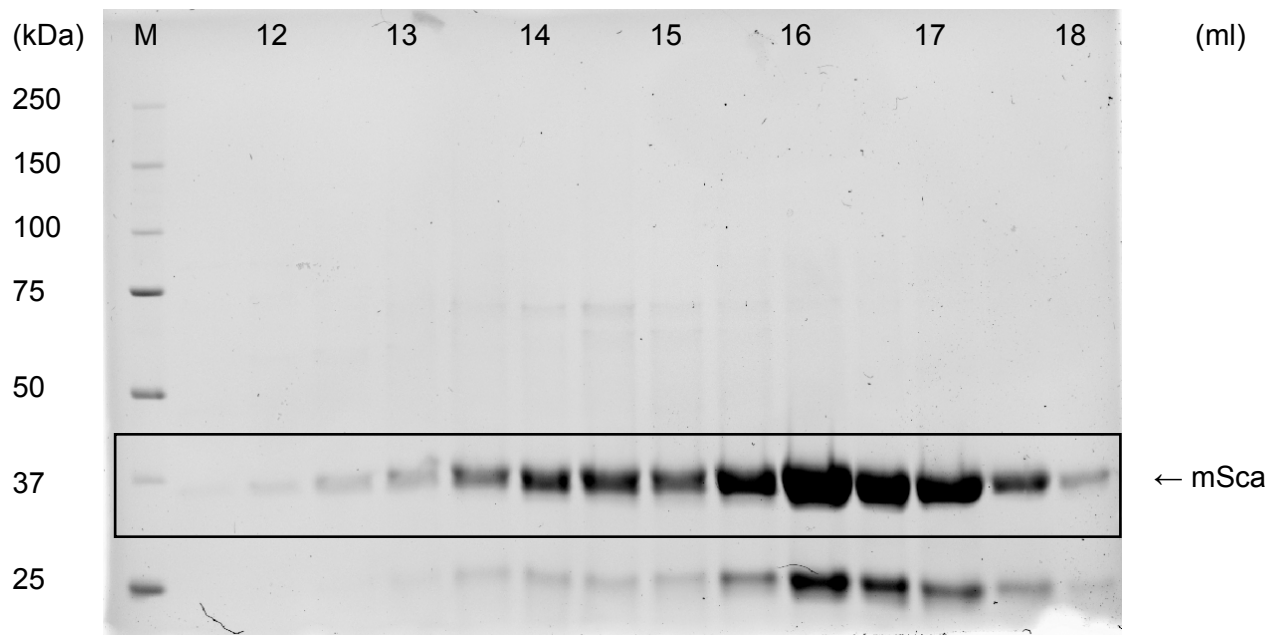

# KLP-6CC2-mSca

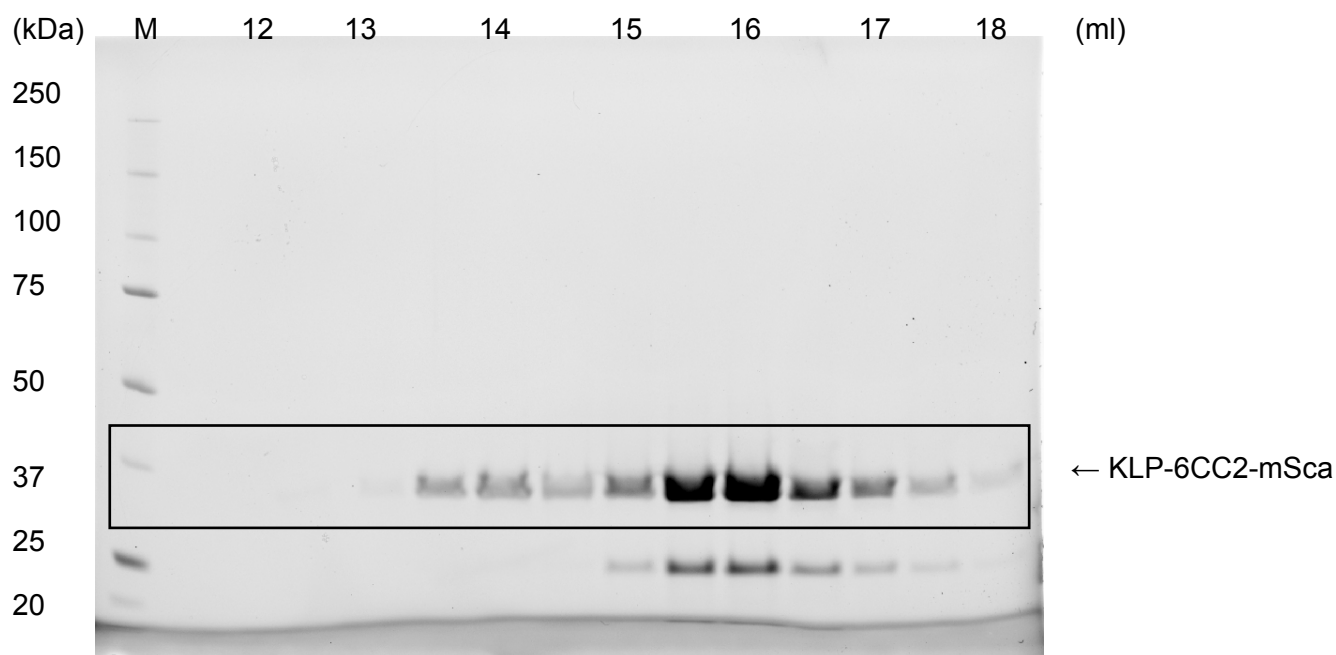

# UNC-104CC2-mSca

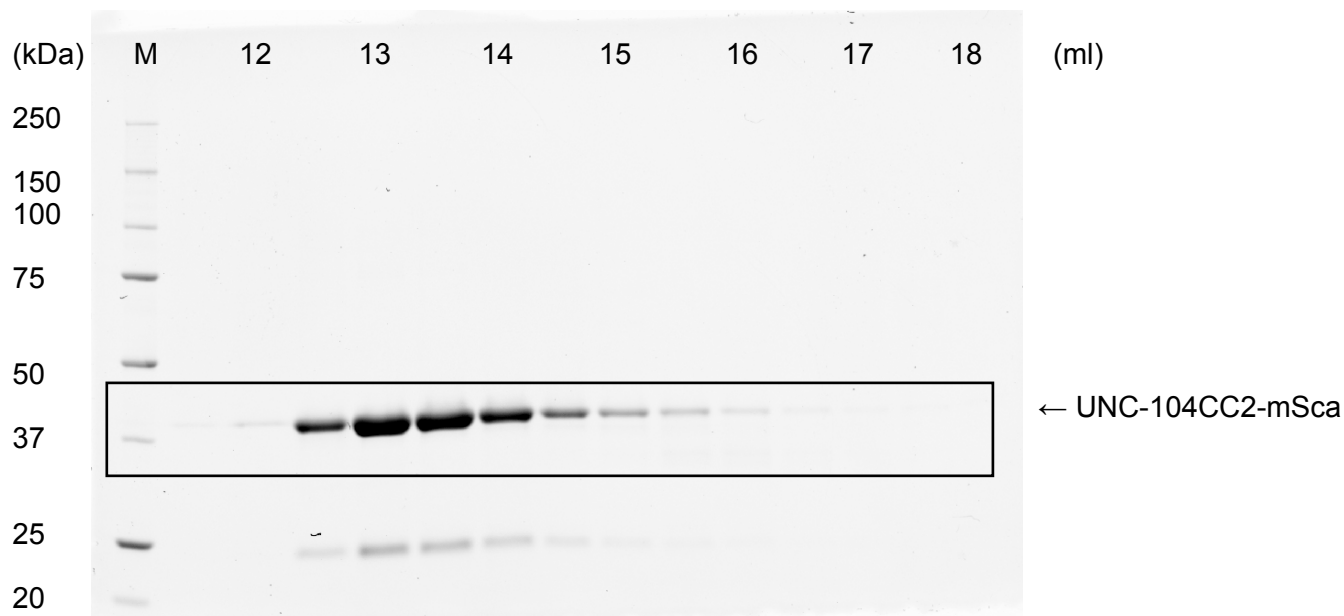

Supplement: fig6-data2 [file elife-89040-fig6-data2-v1.zip]

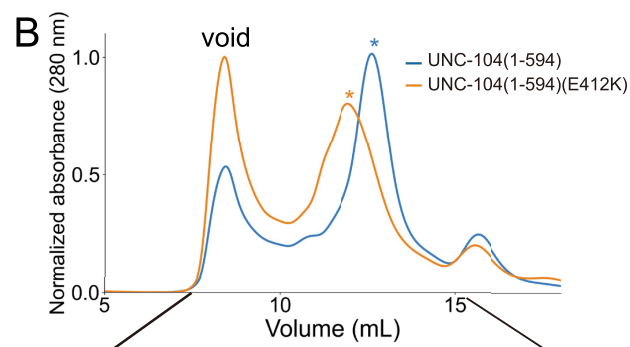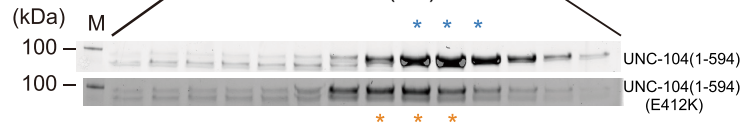

UNC-104(1-594)

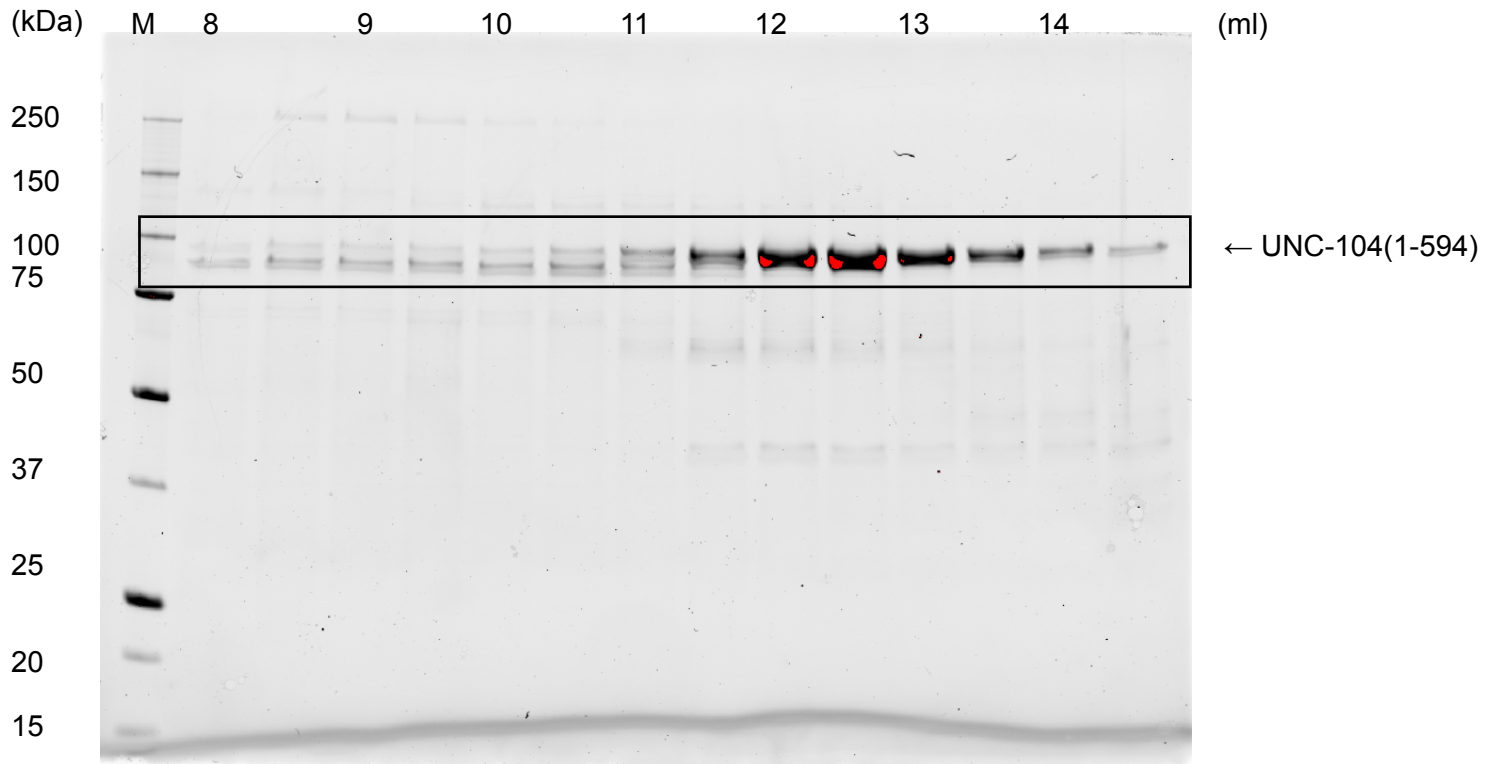

UNC-104(1-594)(E412K)

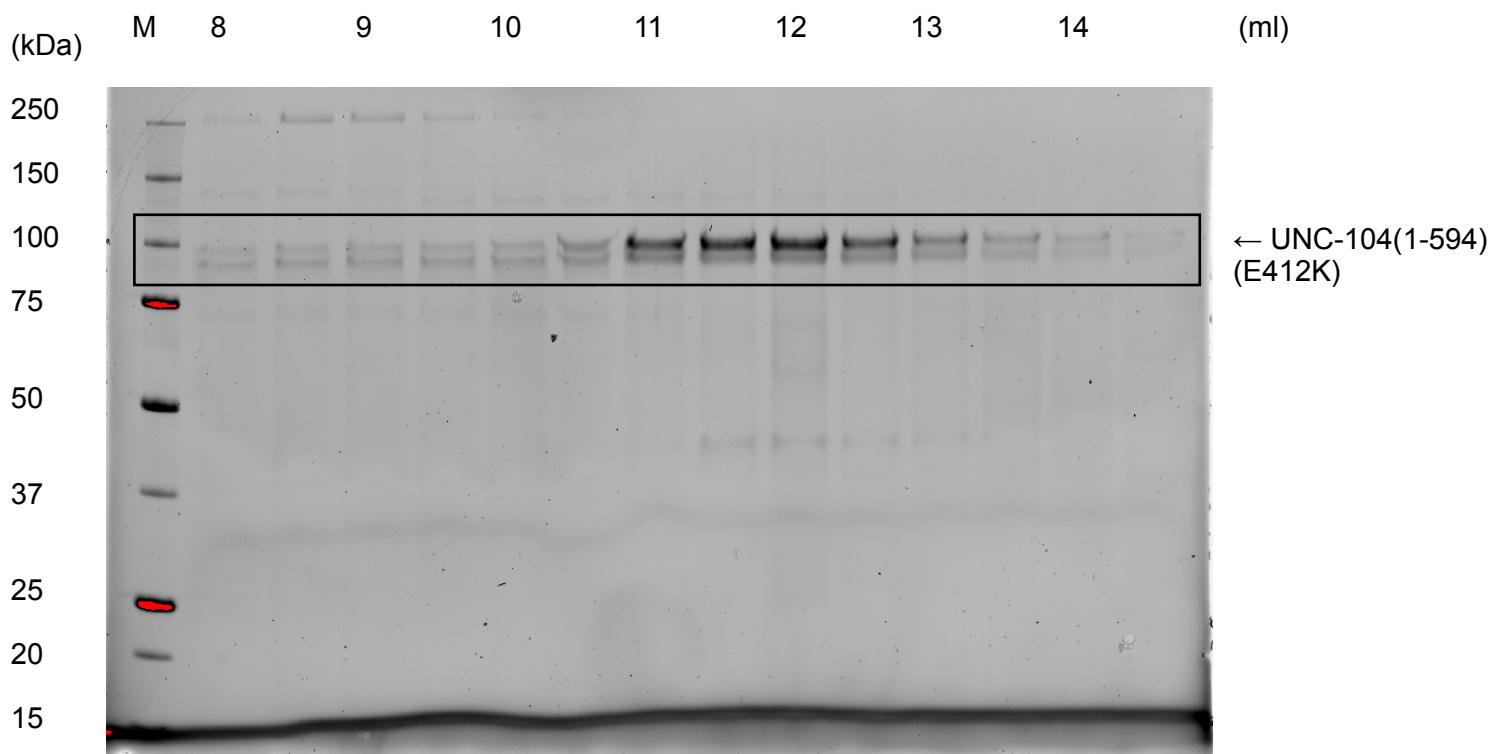

Supplement: fig7-data3 [file elife-89040-fig7-data3-v1.zip]

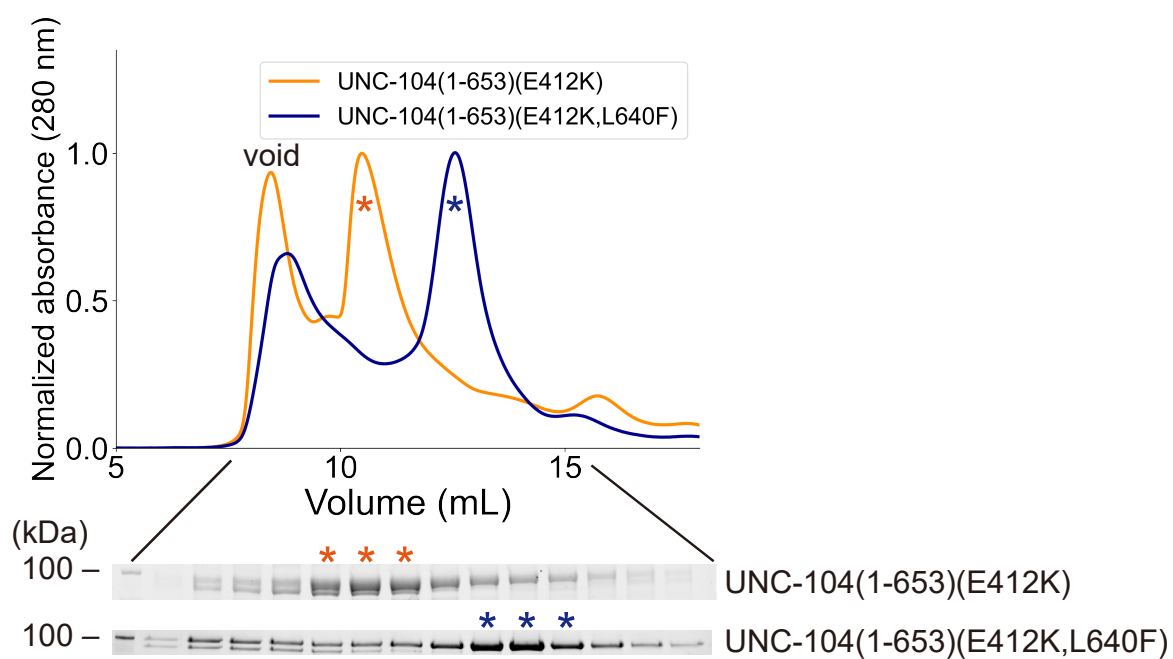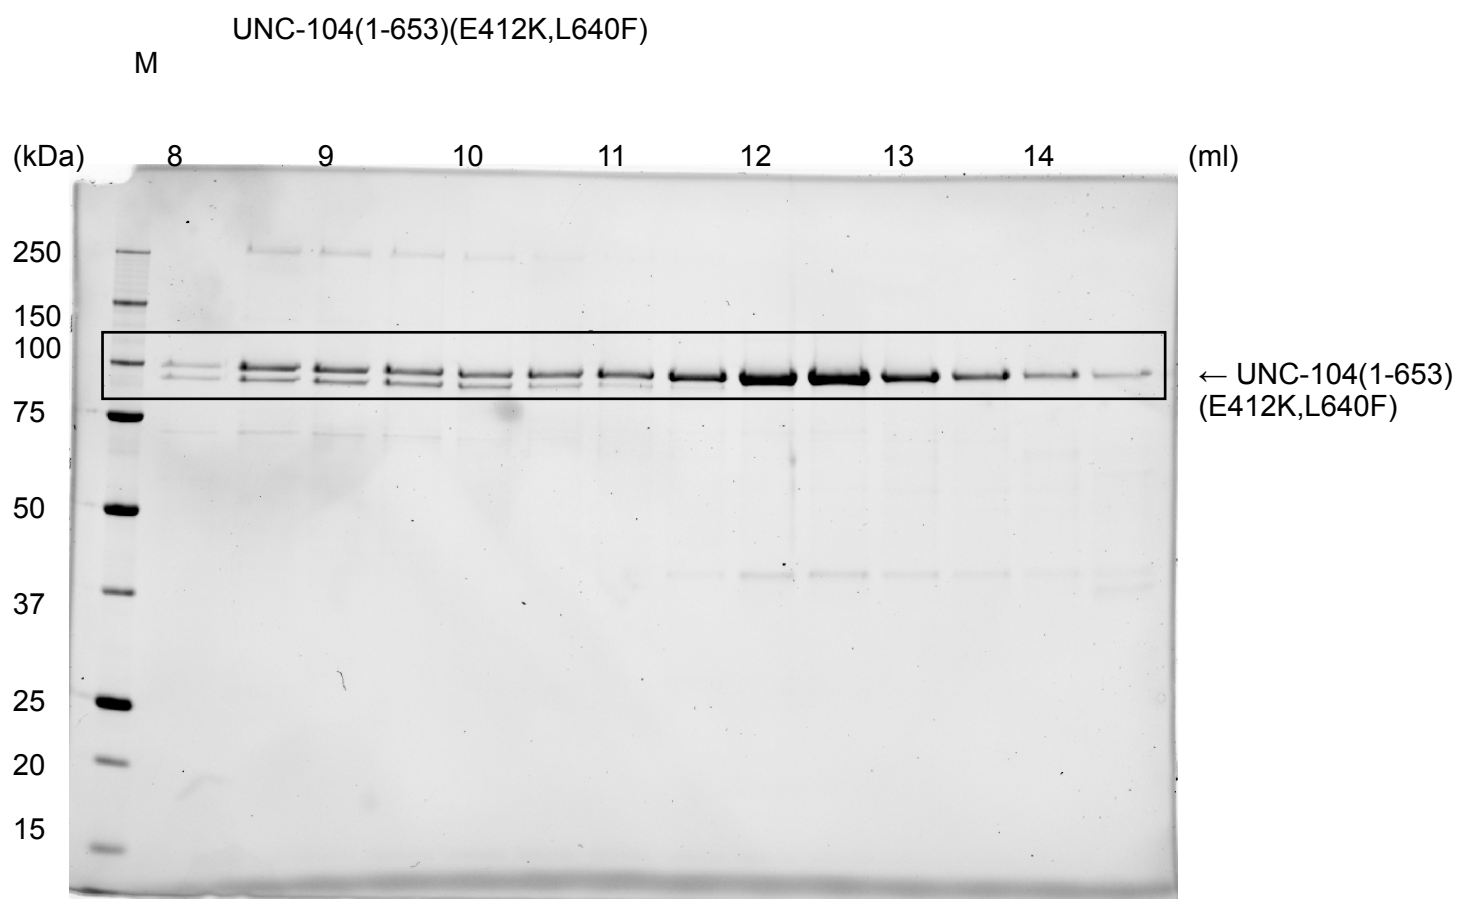

Supplement: fig7-figsupp1-data2 [file elife-89040-fig7-figsupp1-data2-v1.zip]
